# Supplementary material for: Cytotoxic and Antioxidant Activities of Imine Analogs of Trans-Resveratrol towards Murine Neuronal N2a Cells
Source: MDPI journal article supplement (doi:10.3390/molecules27154713), 2022-07-23
Supplement: s1 [file s1]

<sup>1</sup>H NMR AZA-ST **1a**  
Solvent: DMSO d<sub>6</sub>

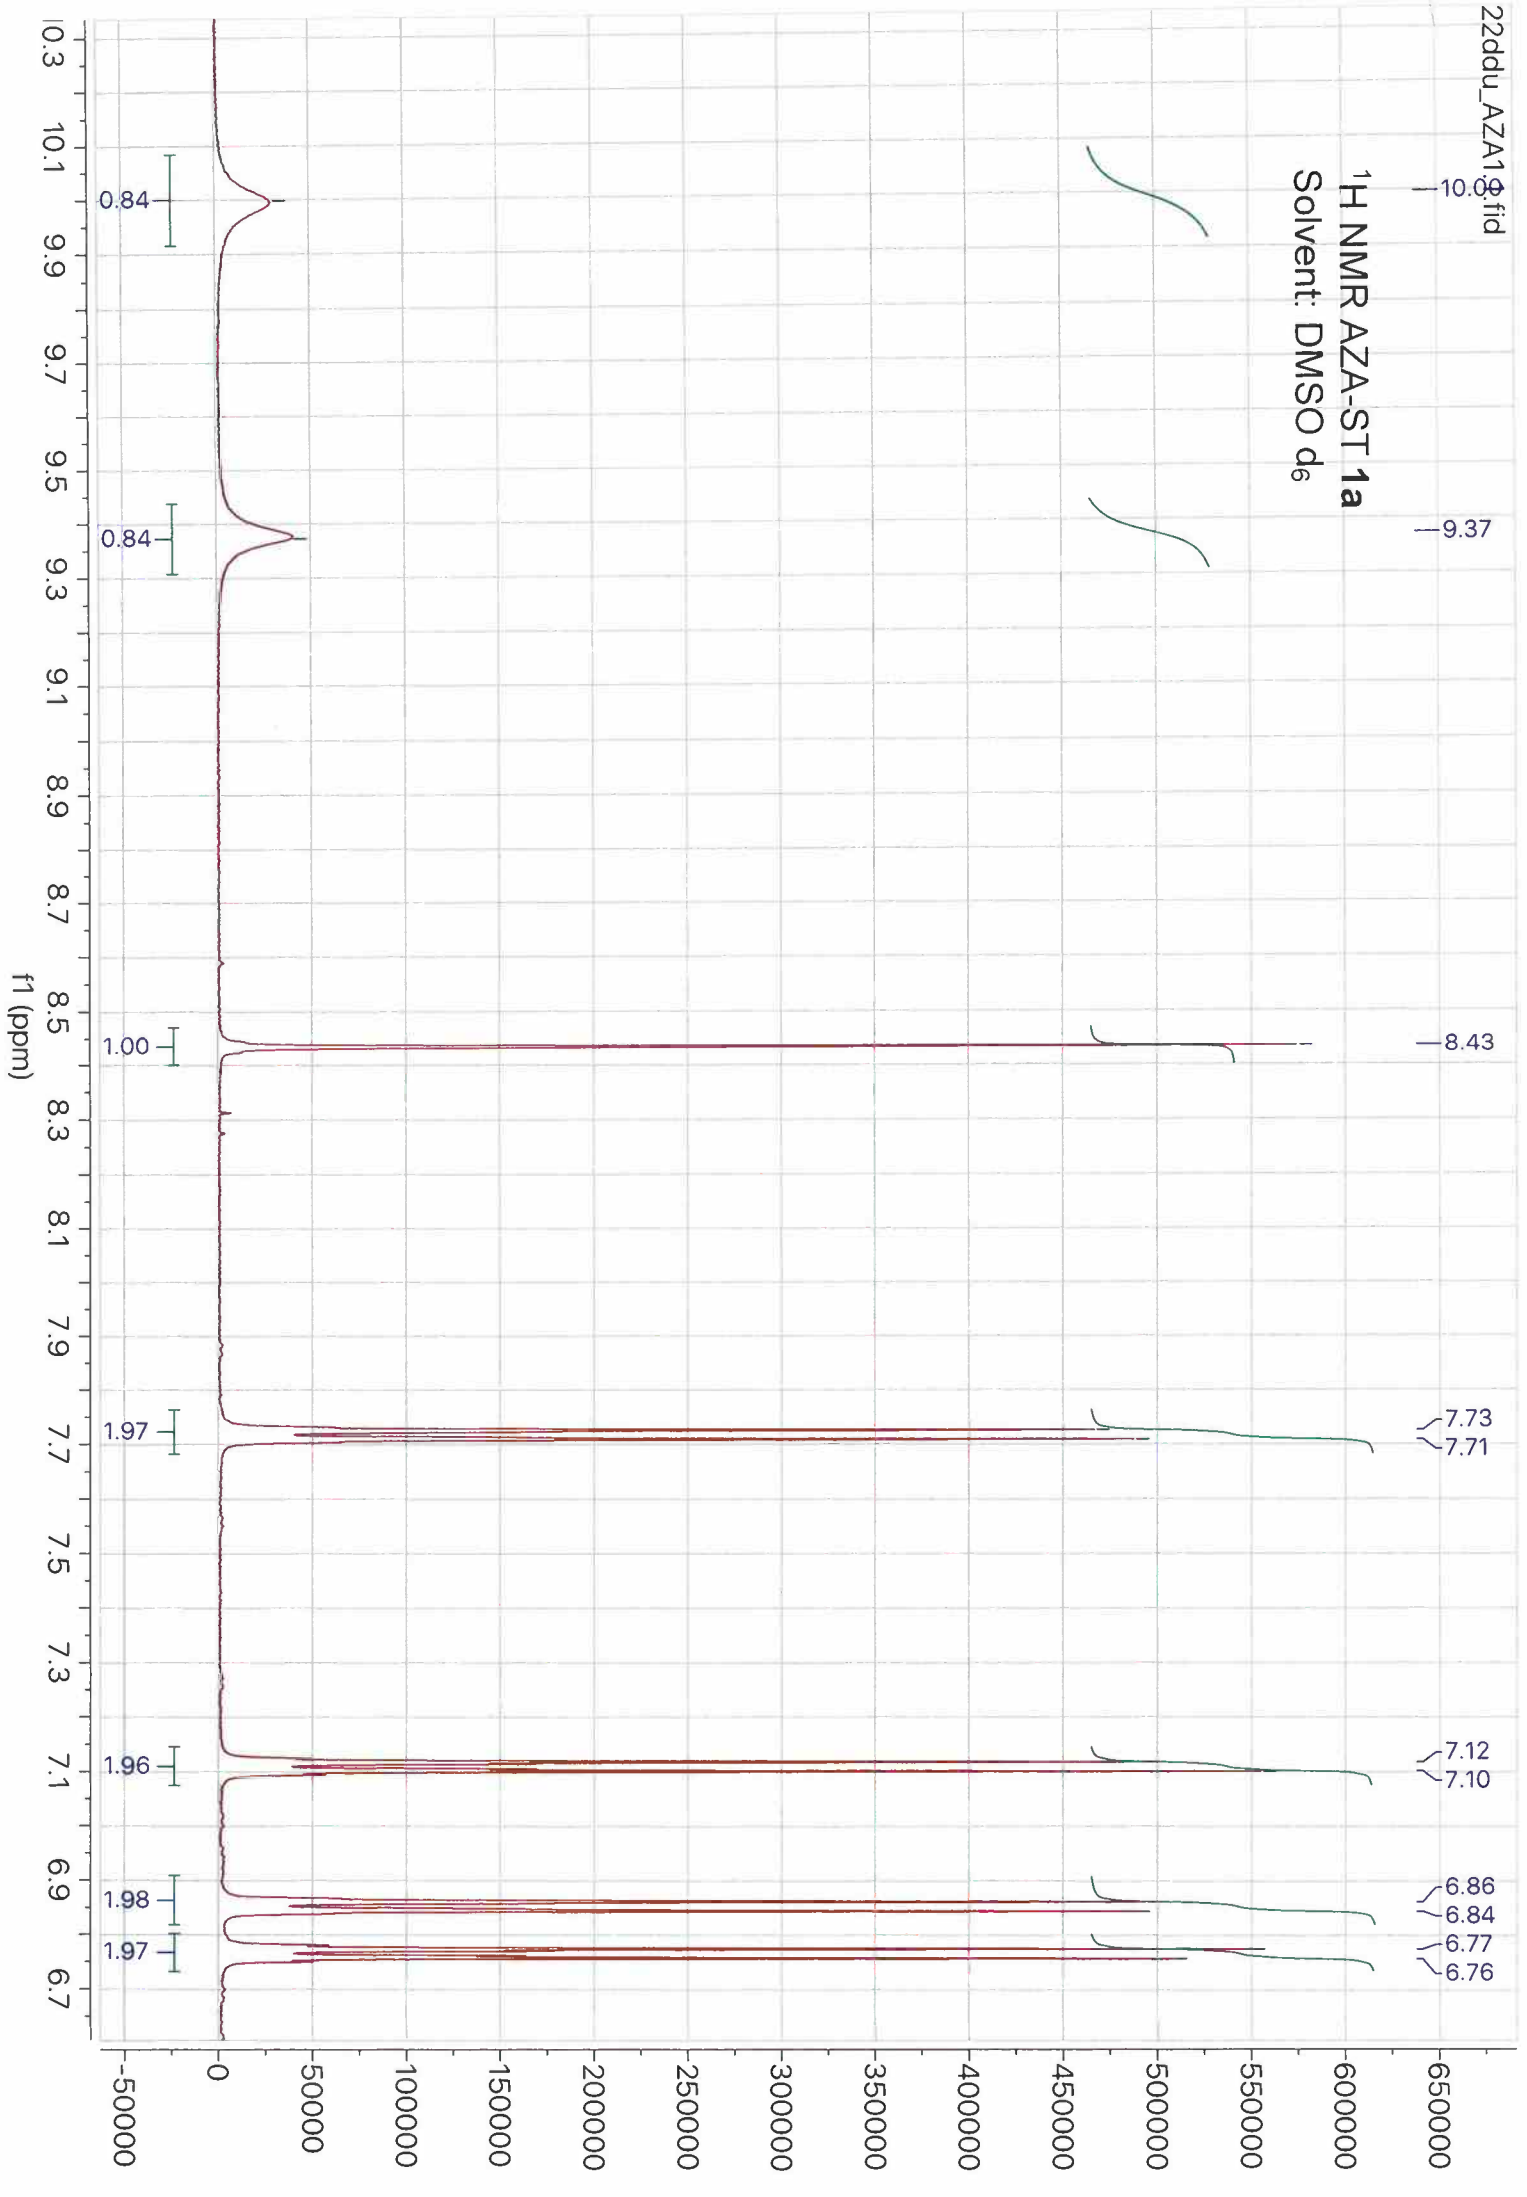

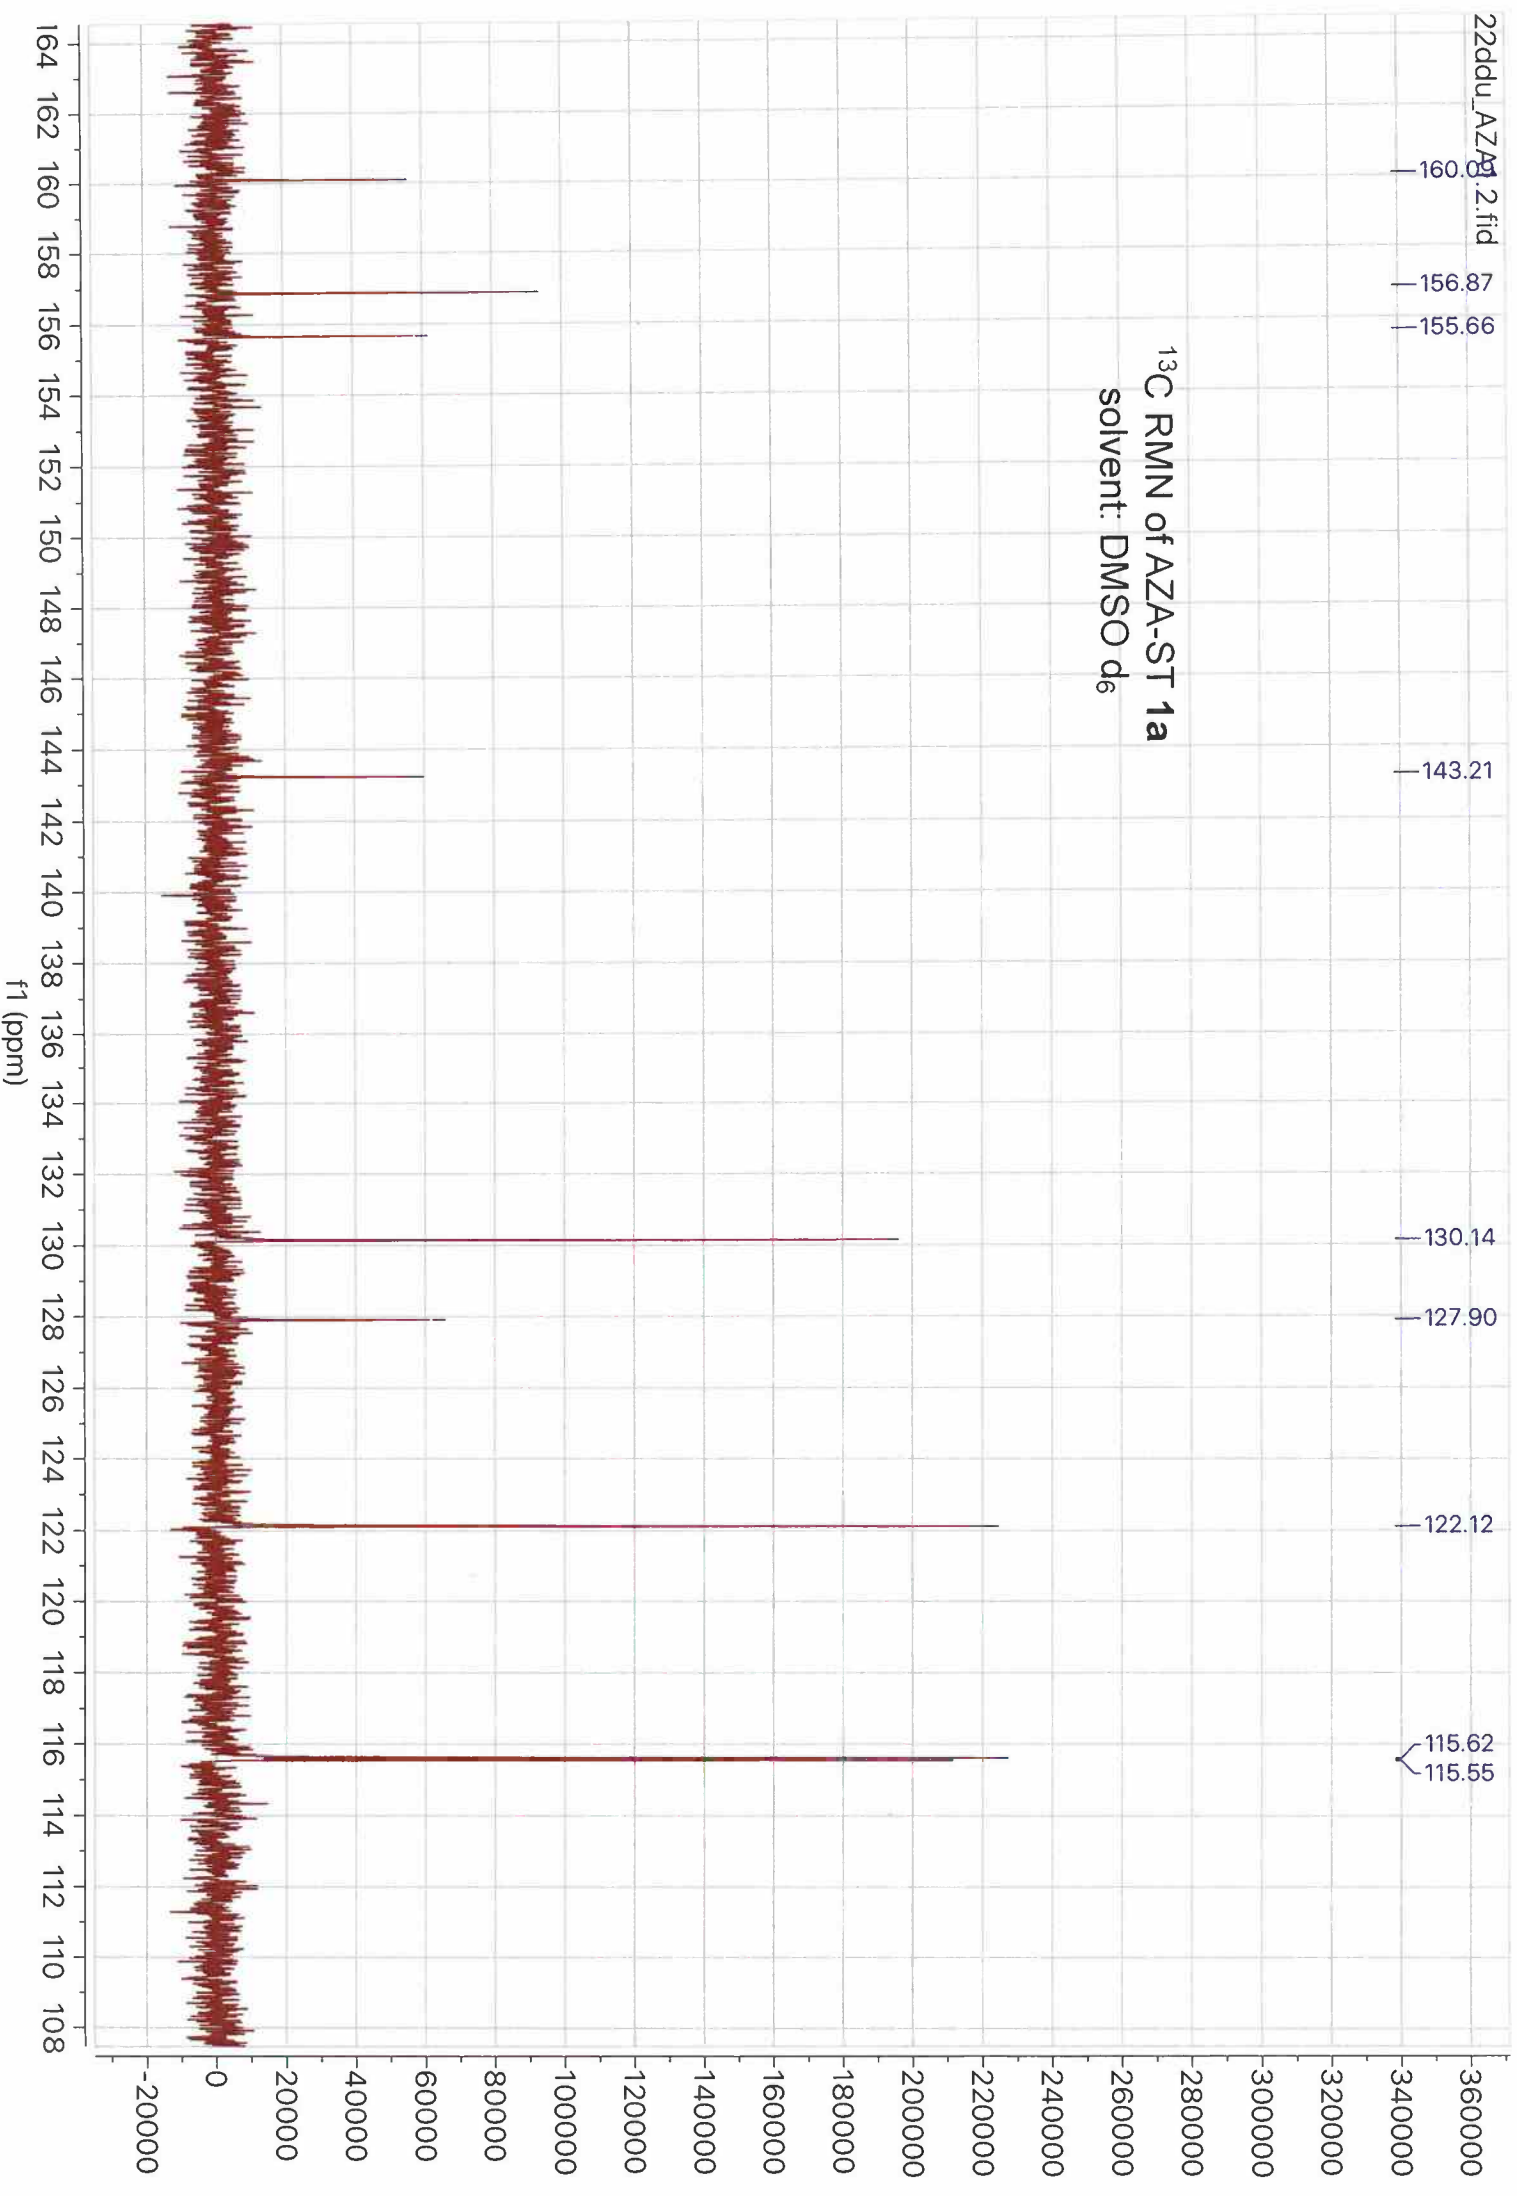

9.61  
9.48

<sup>1</sup>H RMN of AZA-ST 1b  
solvent: DMSO d<sub>6</sub>

8.51

7.33  
7.29  
7.19  
7.17

6.88  
6.80  
6.78

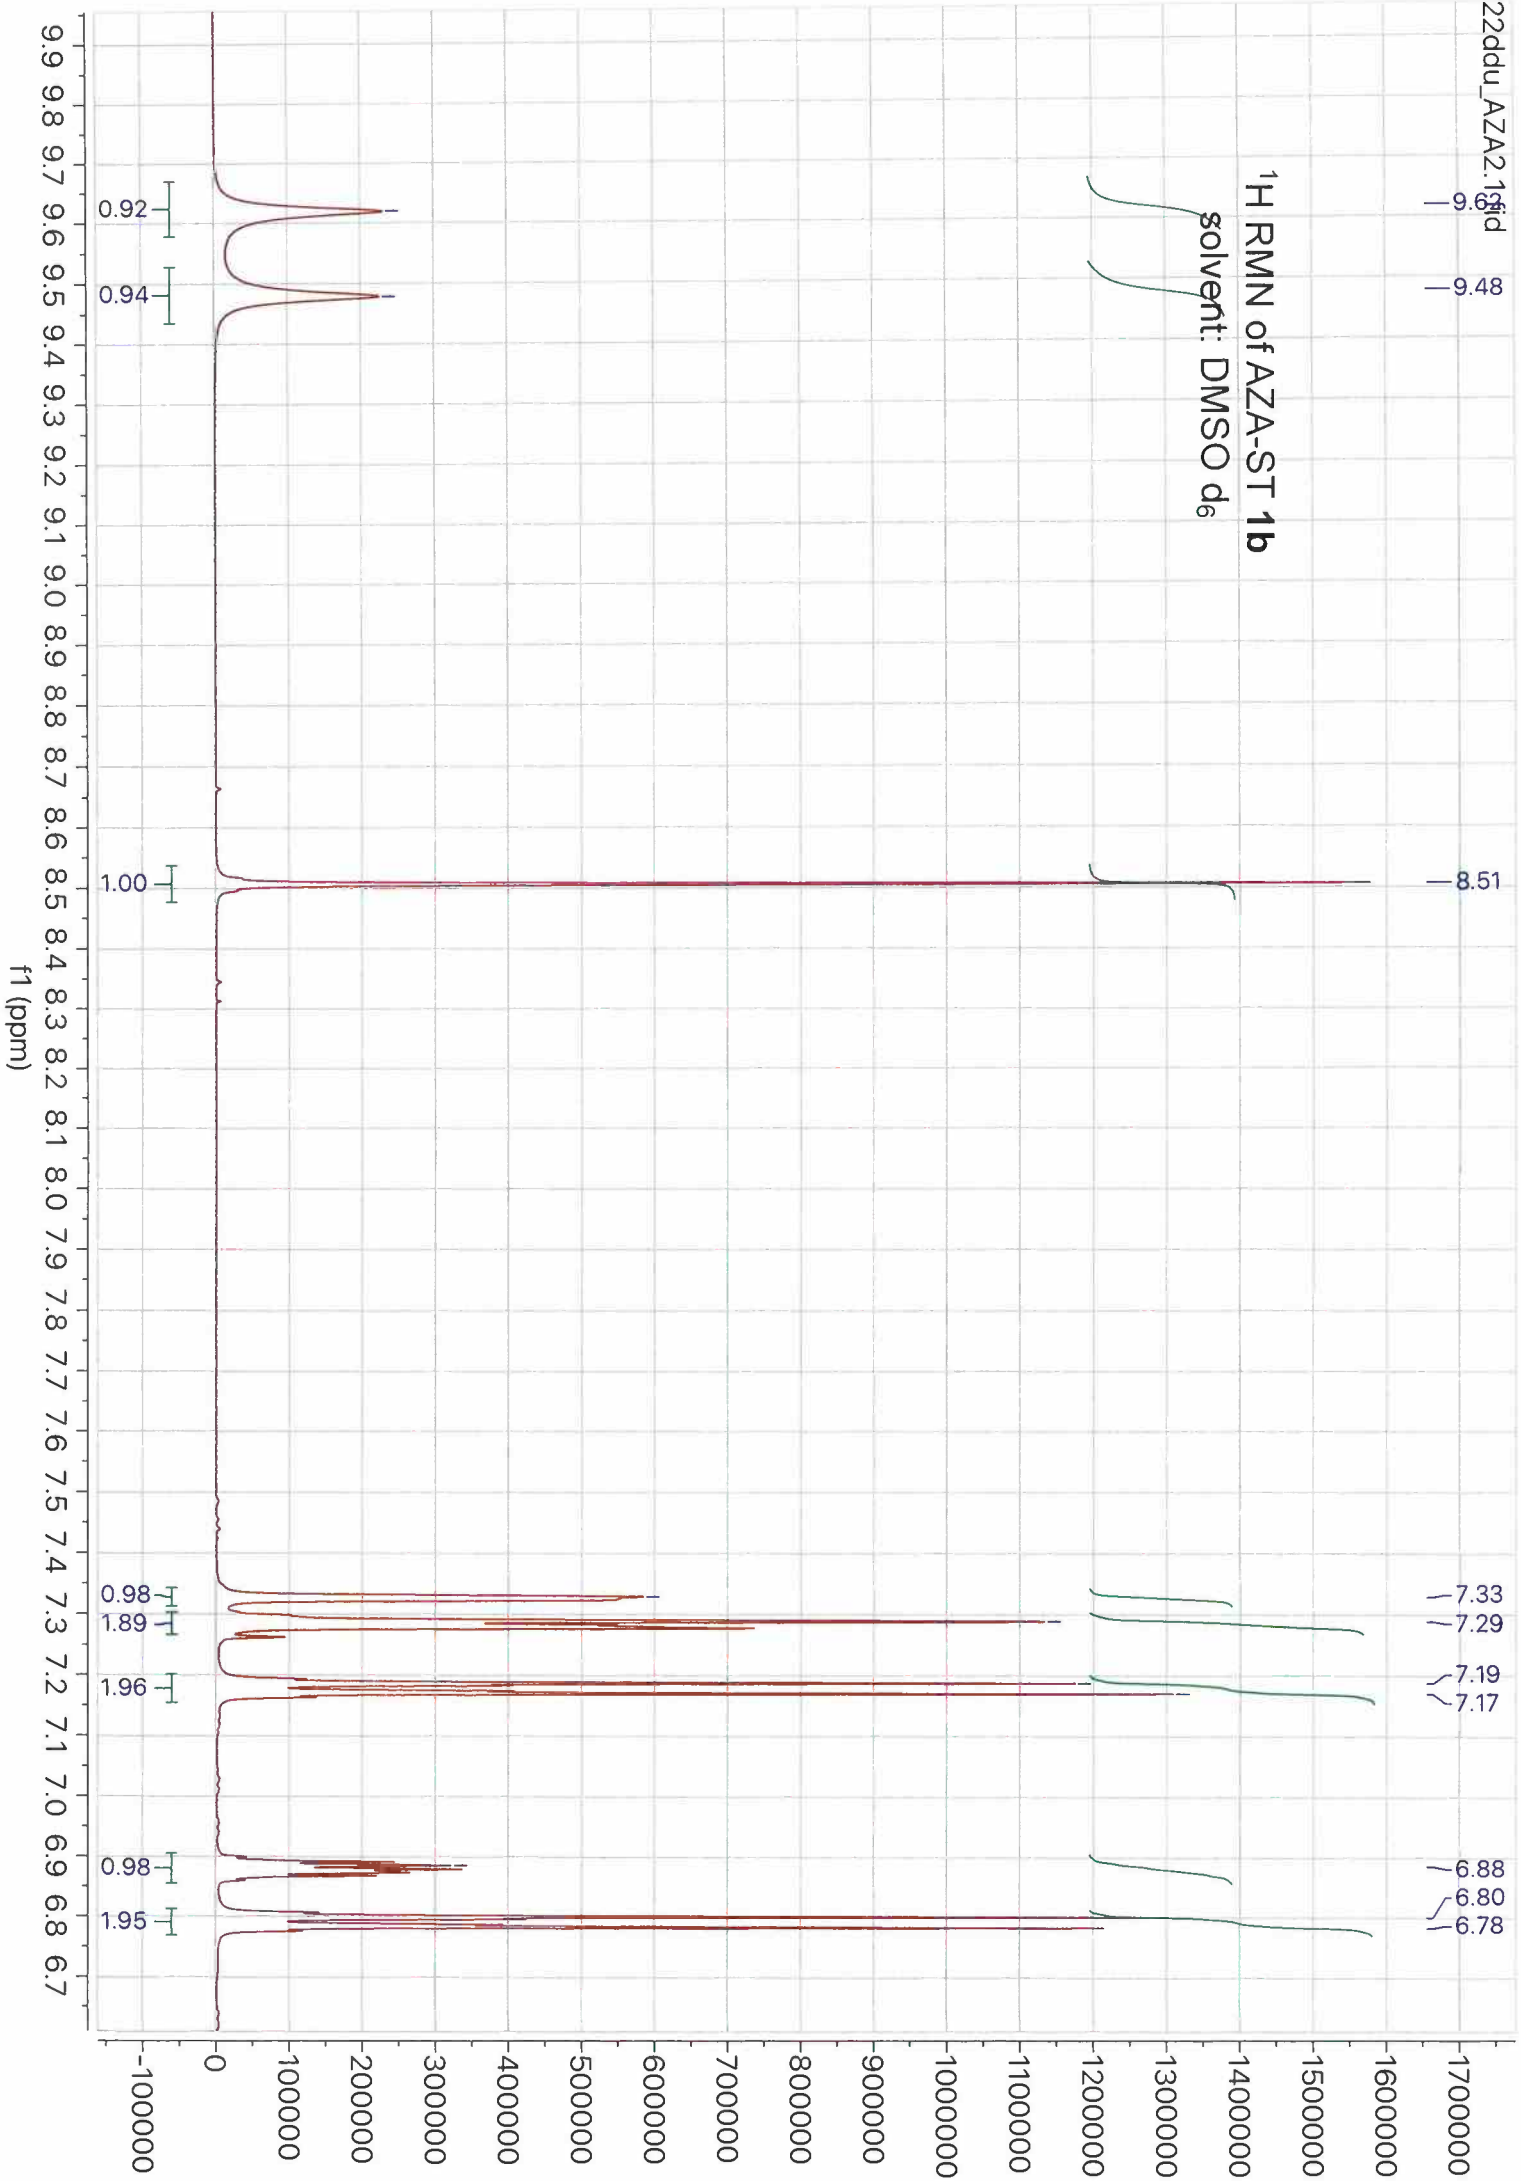

22ddu\_AZA28-5b

157.63  
157.29  
156.23

<sup>13</sup>C RMN of AZA-ST 1b  
solvent: DMSO d<sub>6</sub>

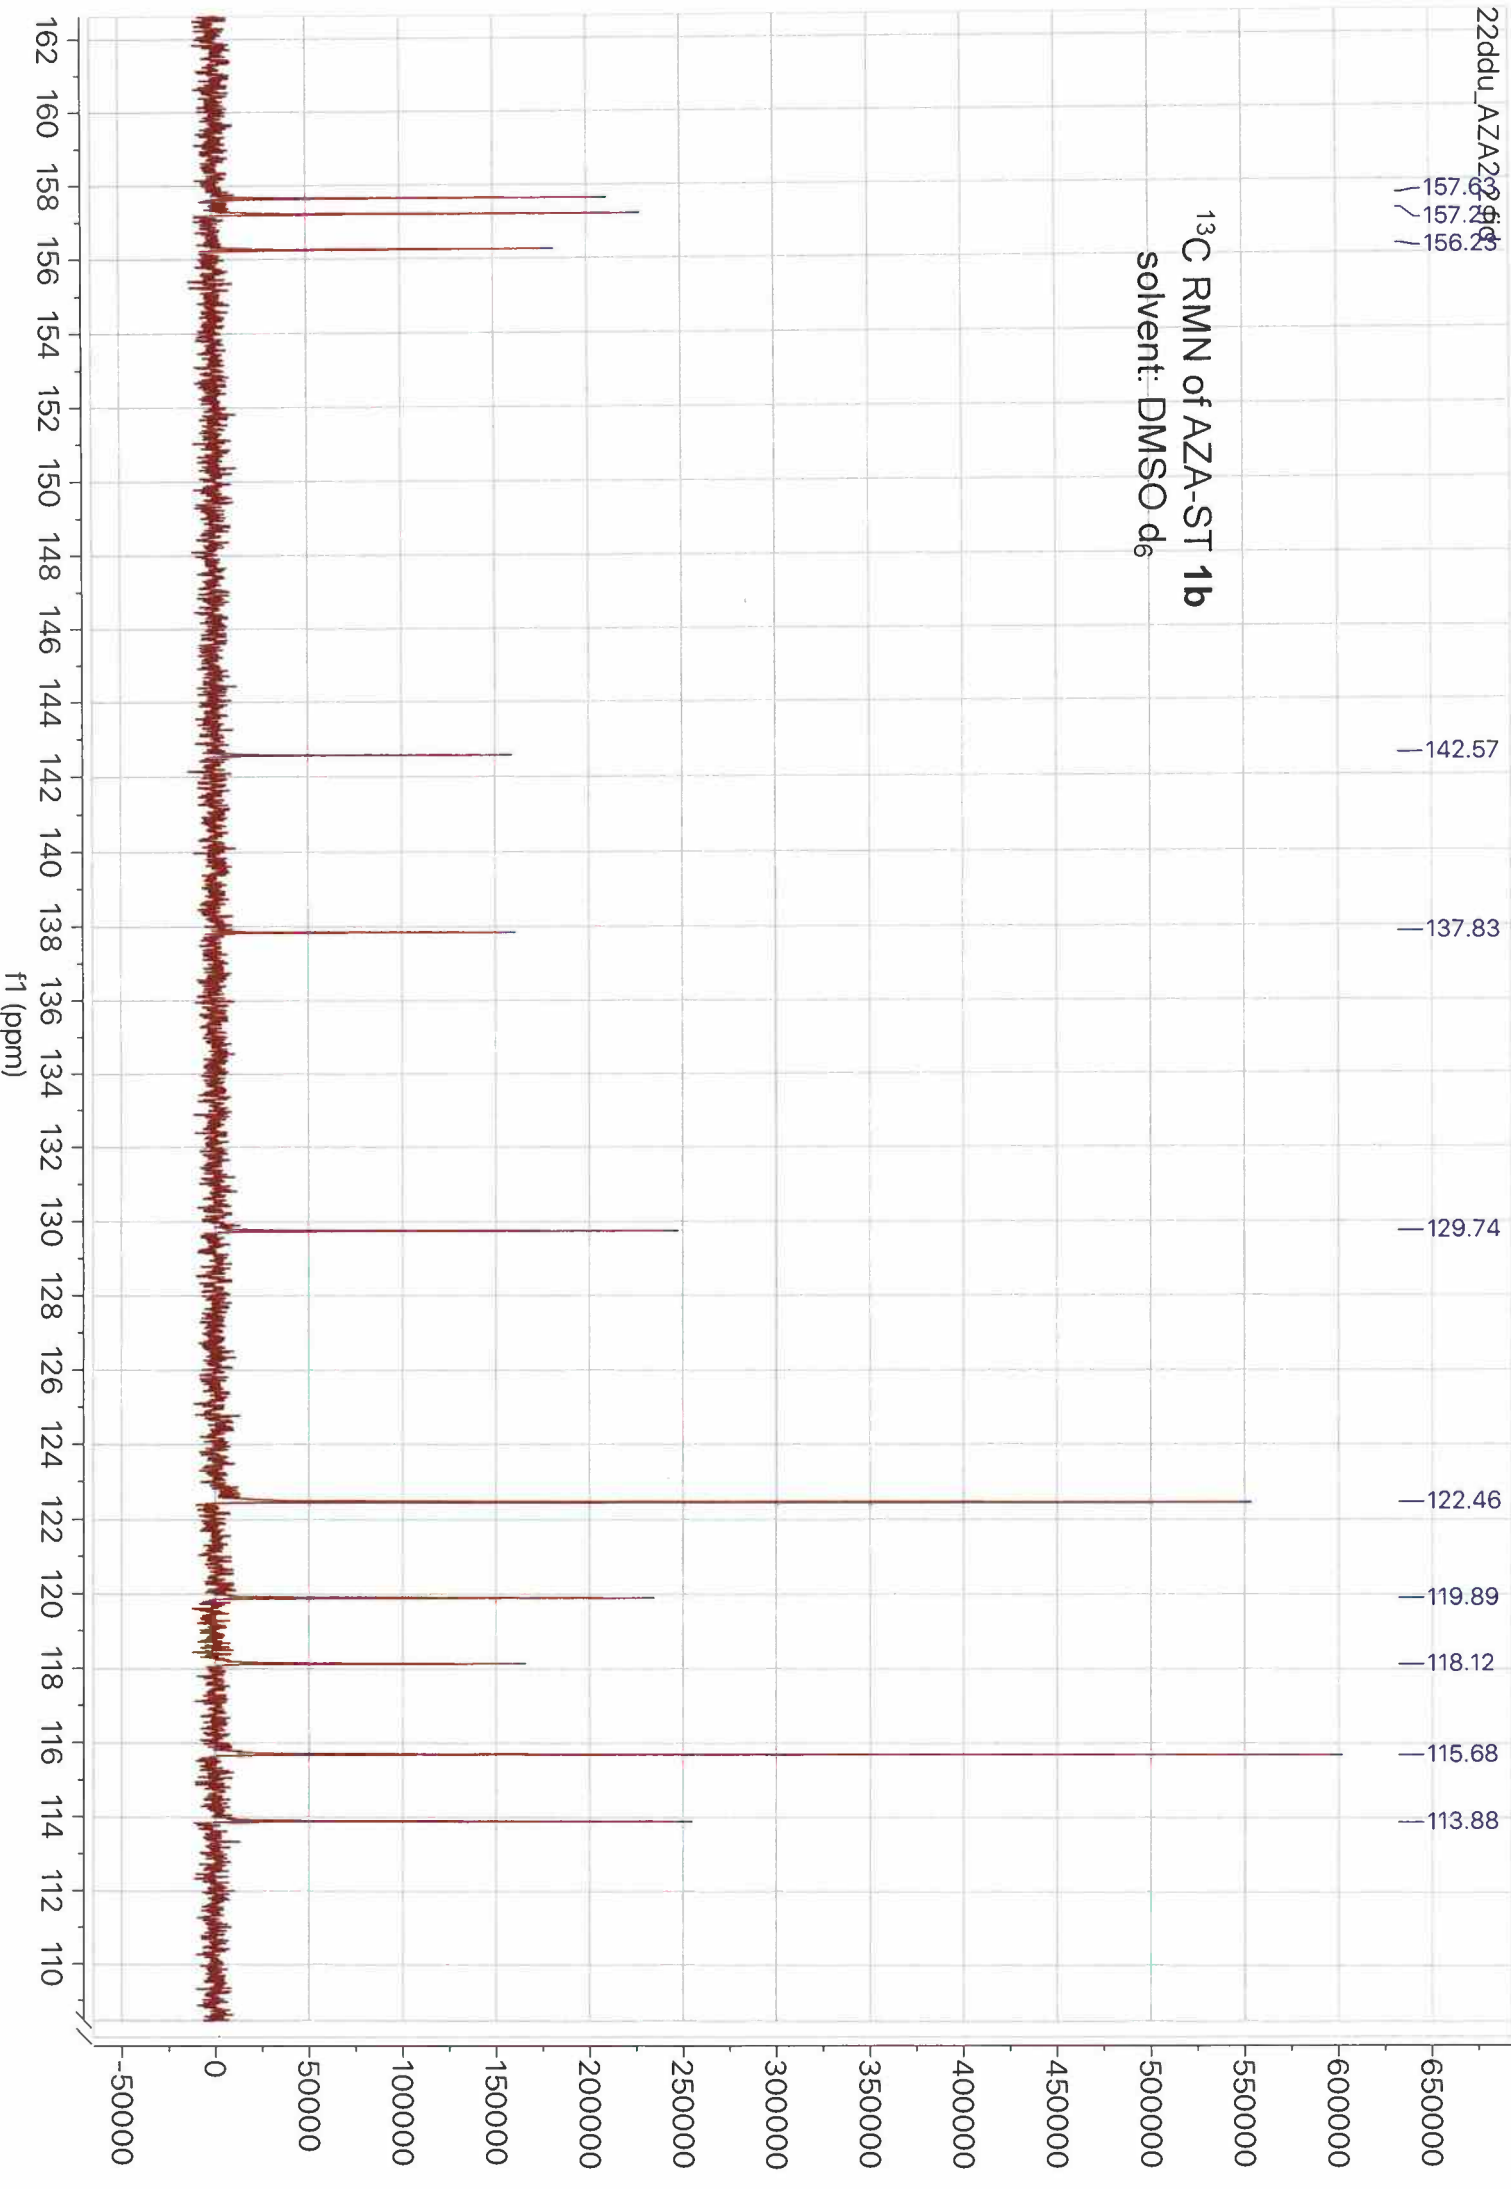

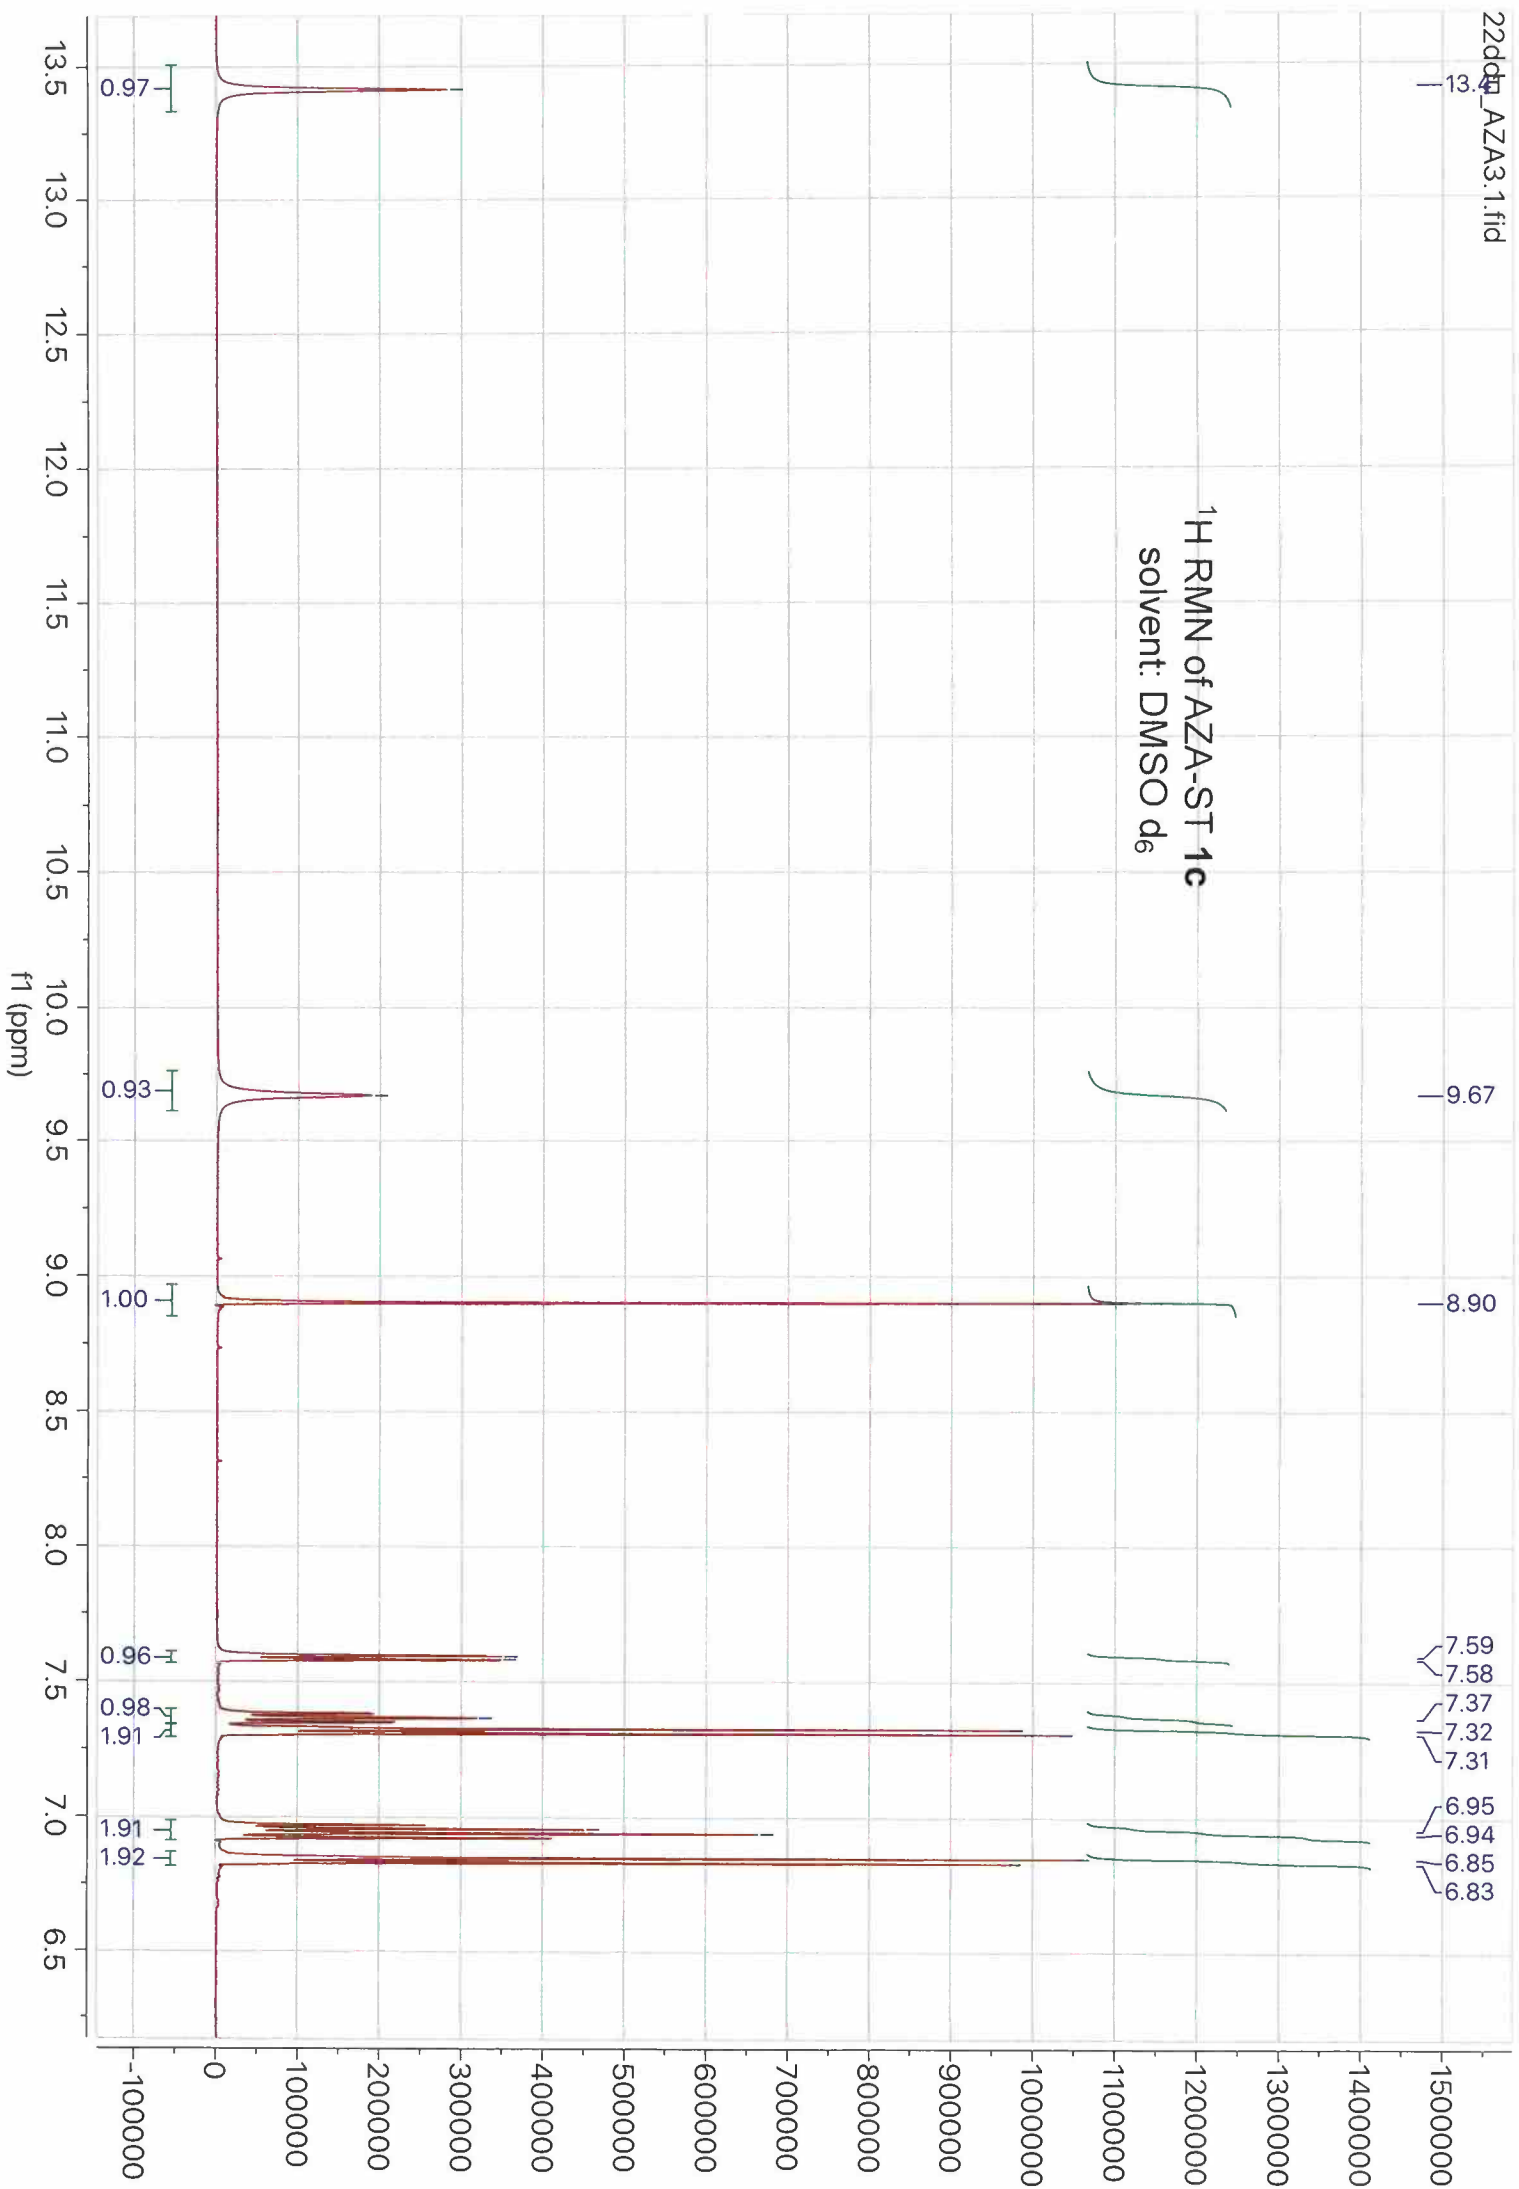

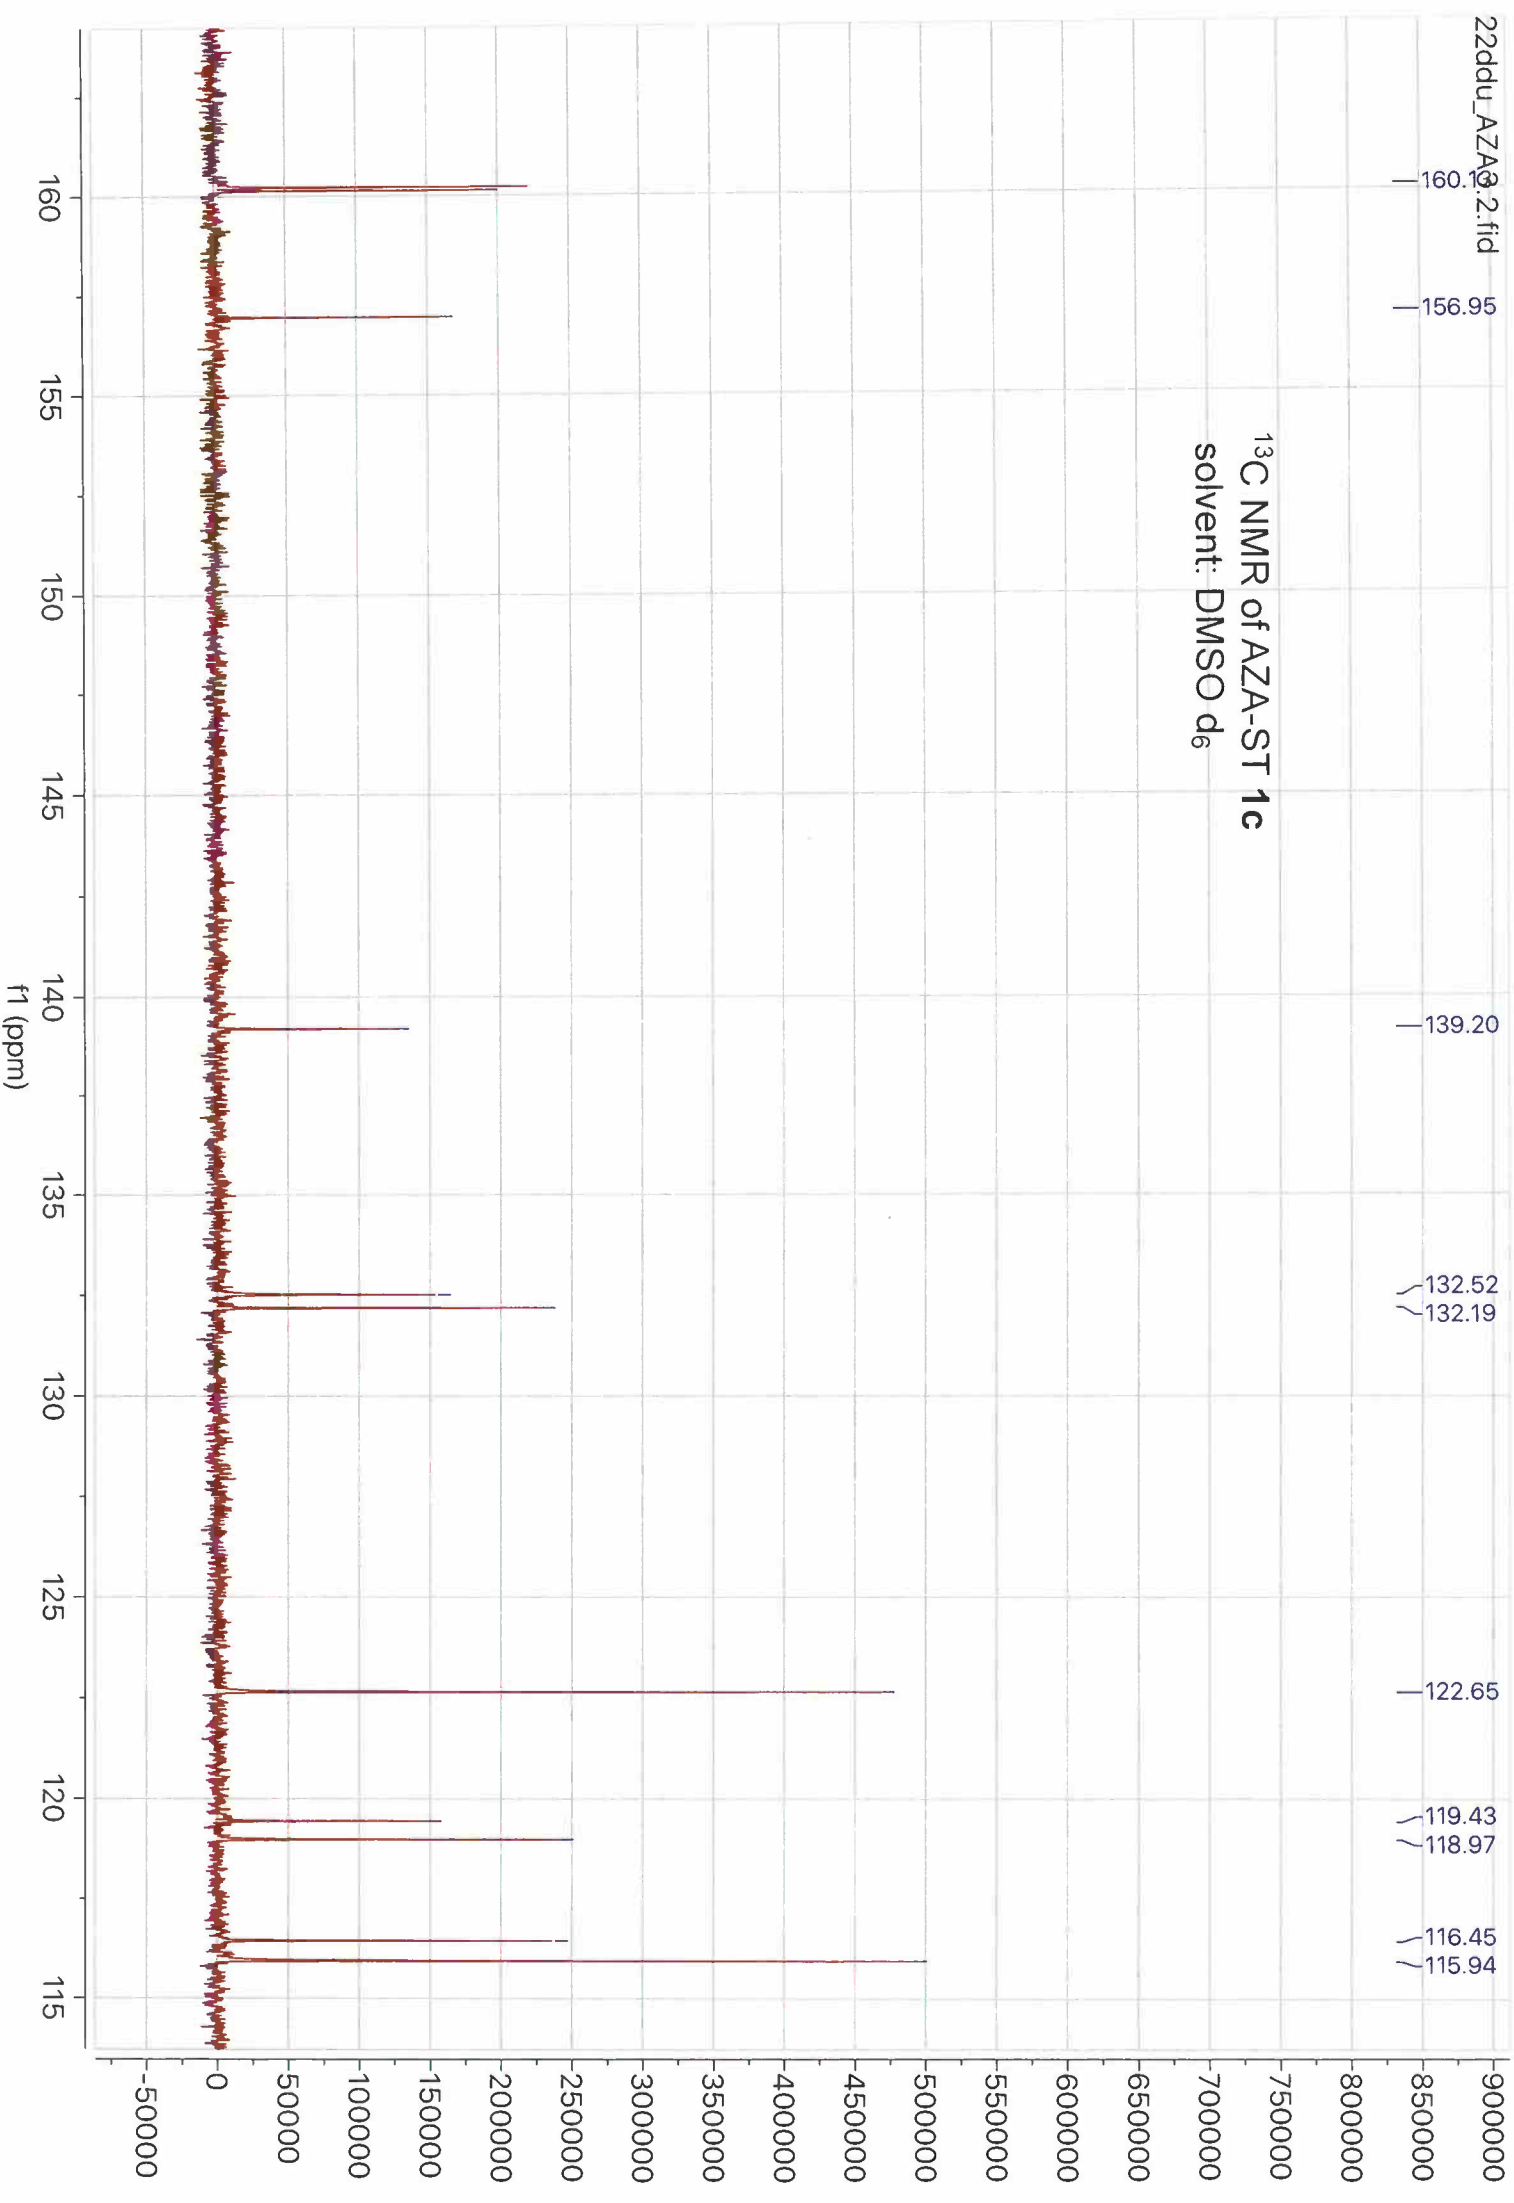



<sup>1</sup>H NMR of AZA-ST 1d  
solvent: DMSO d<sub>6</sub>

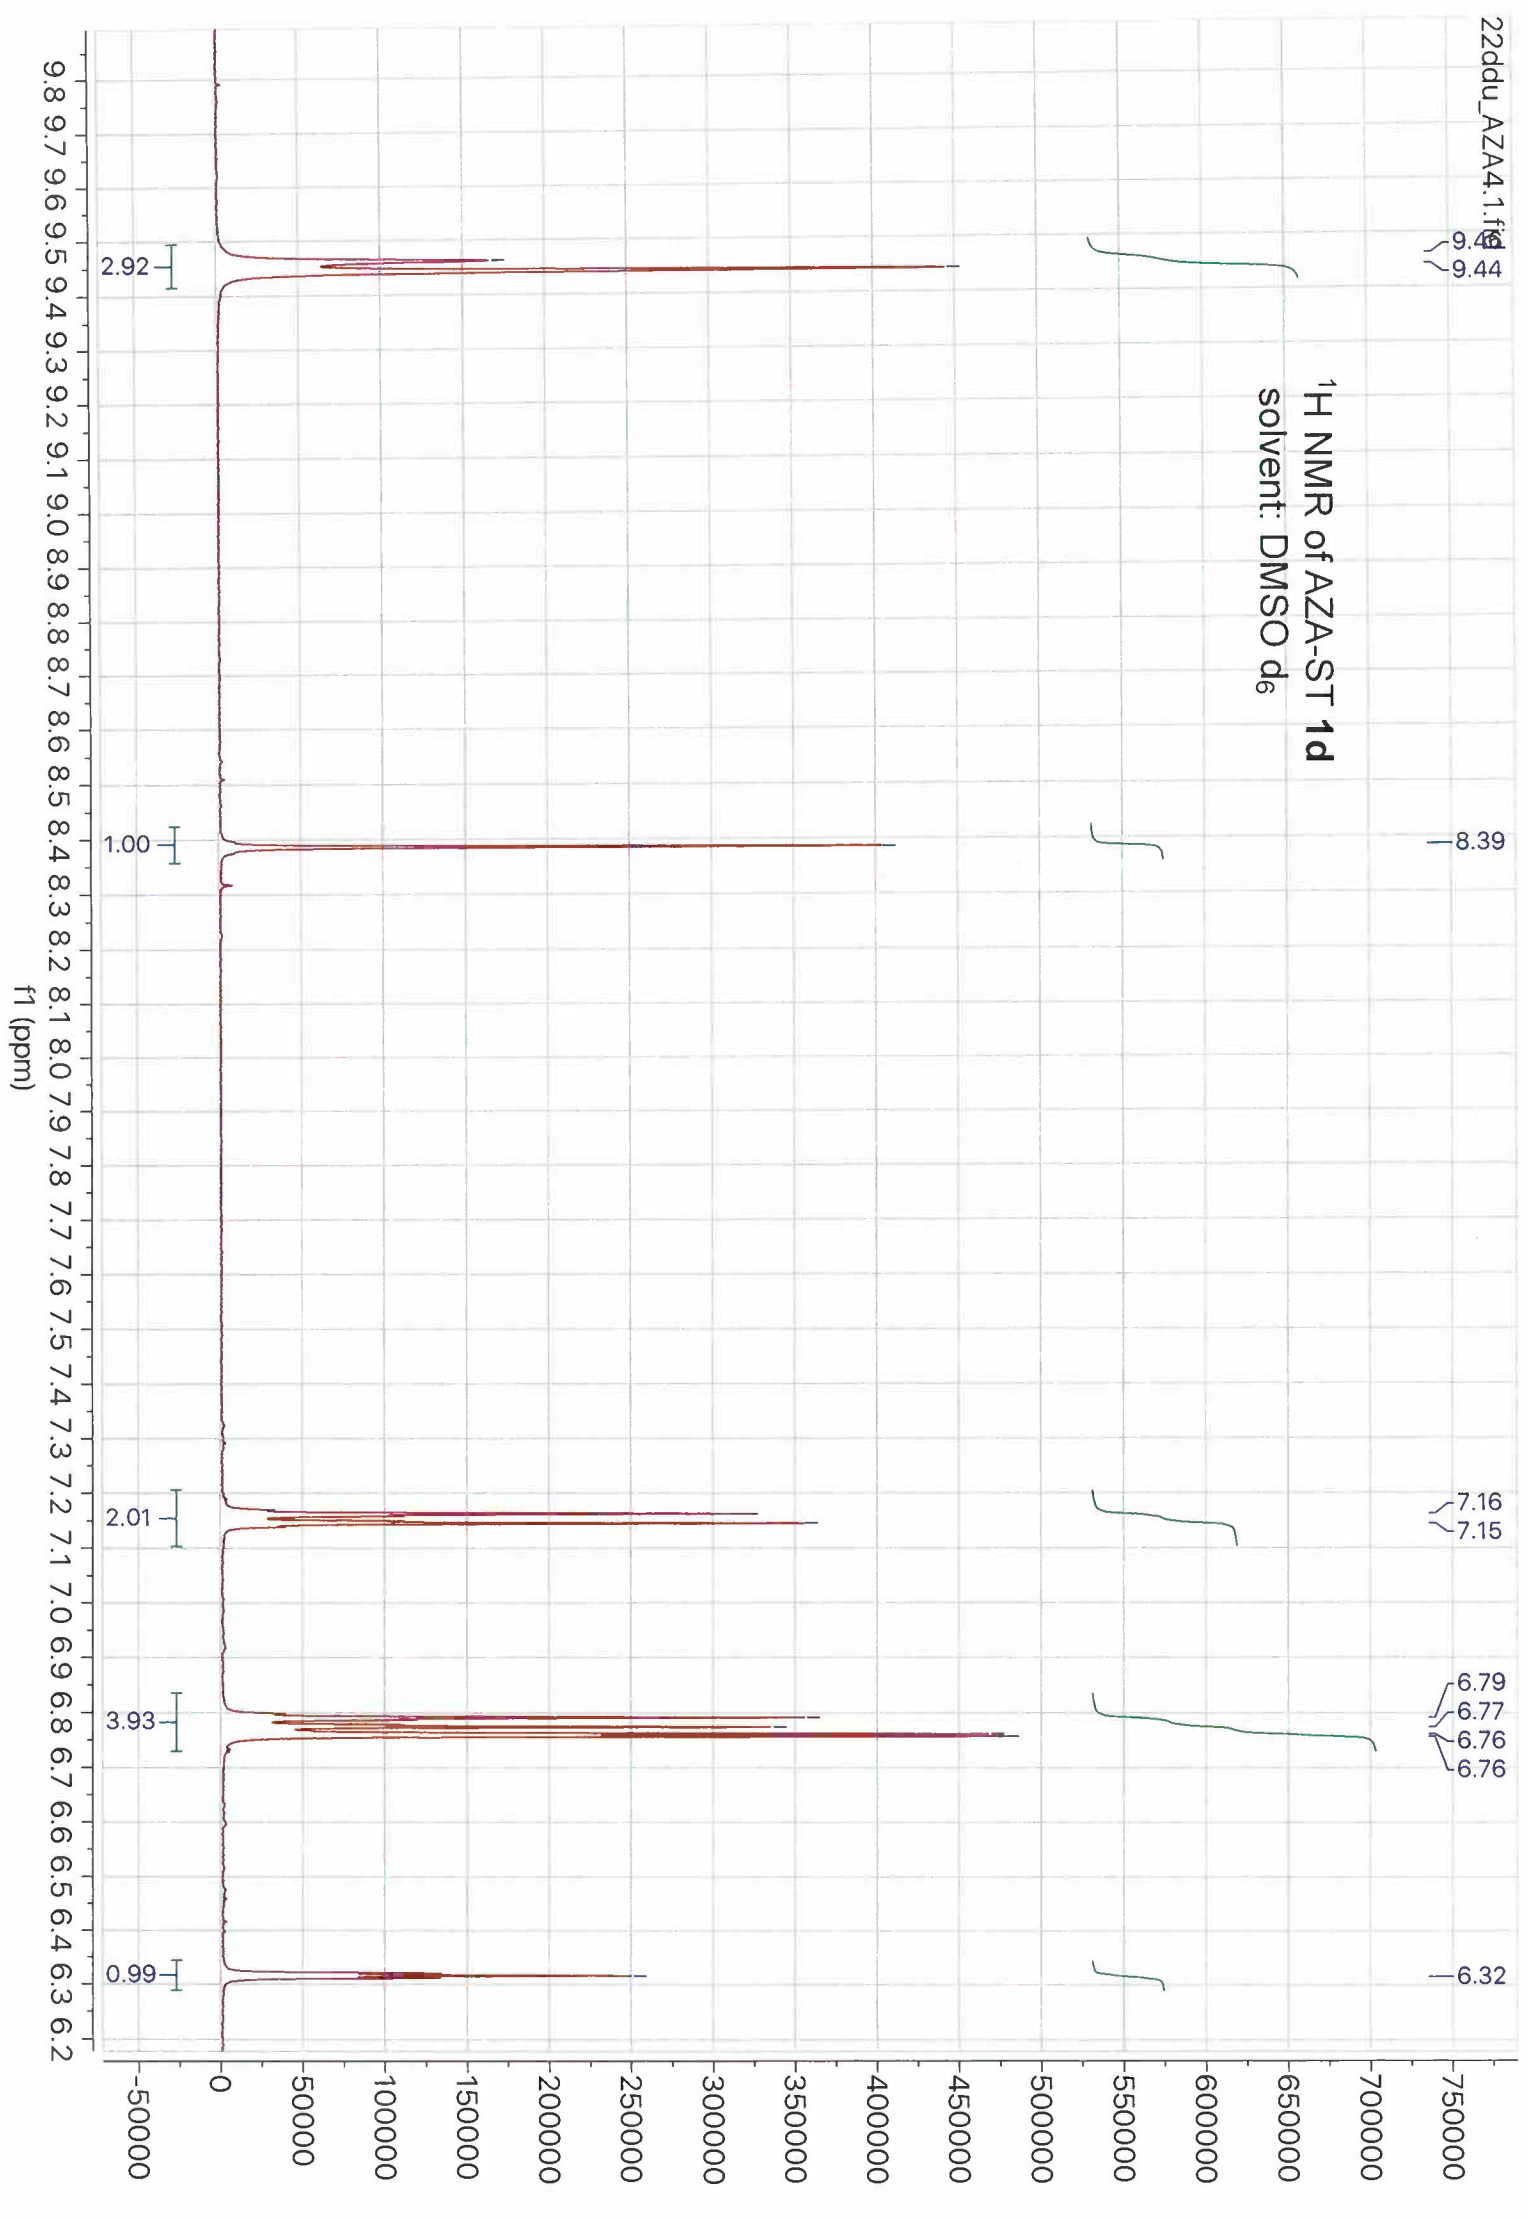

158.81  
157.39  
156.15

<sup>13</sup>C NMR of AZA-ST **1d**  
Solvent: DMSO d<sub>6</sub>

142.57

138.32

122.43

115.65

106.33

105.19

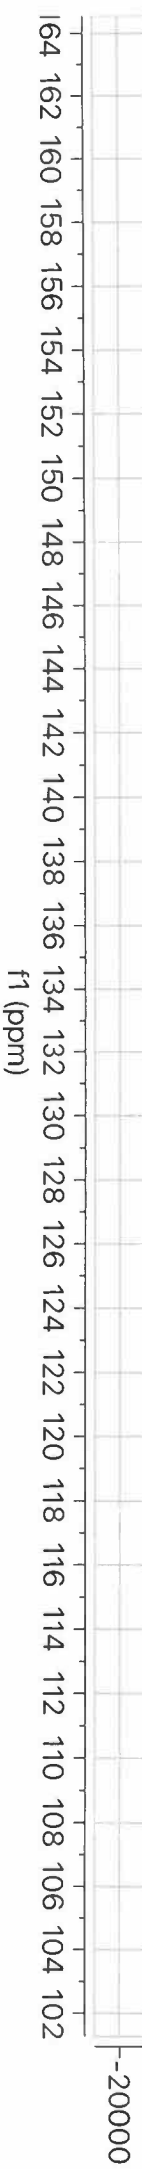



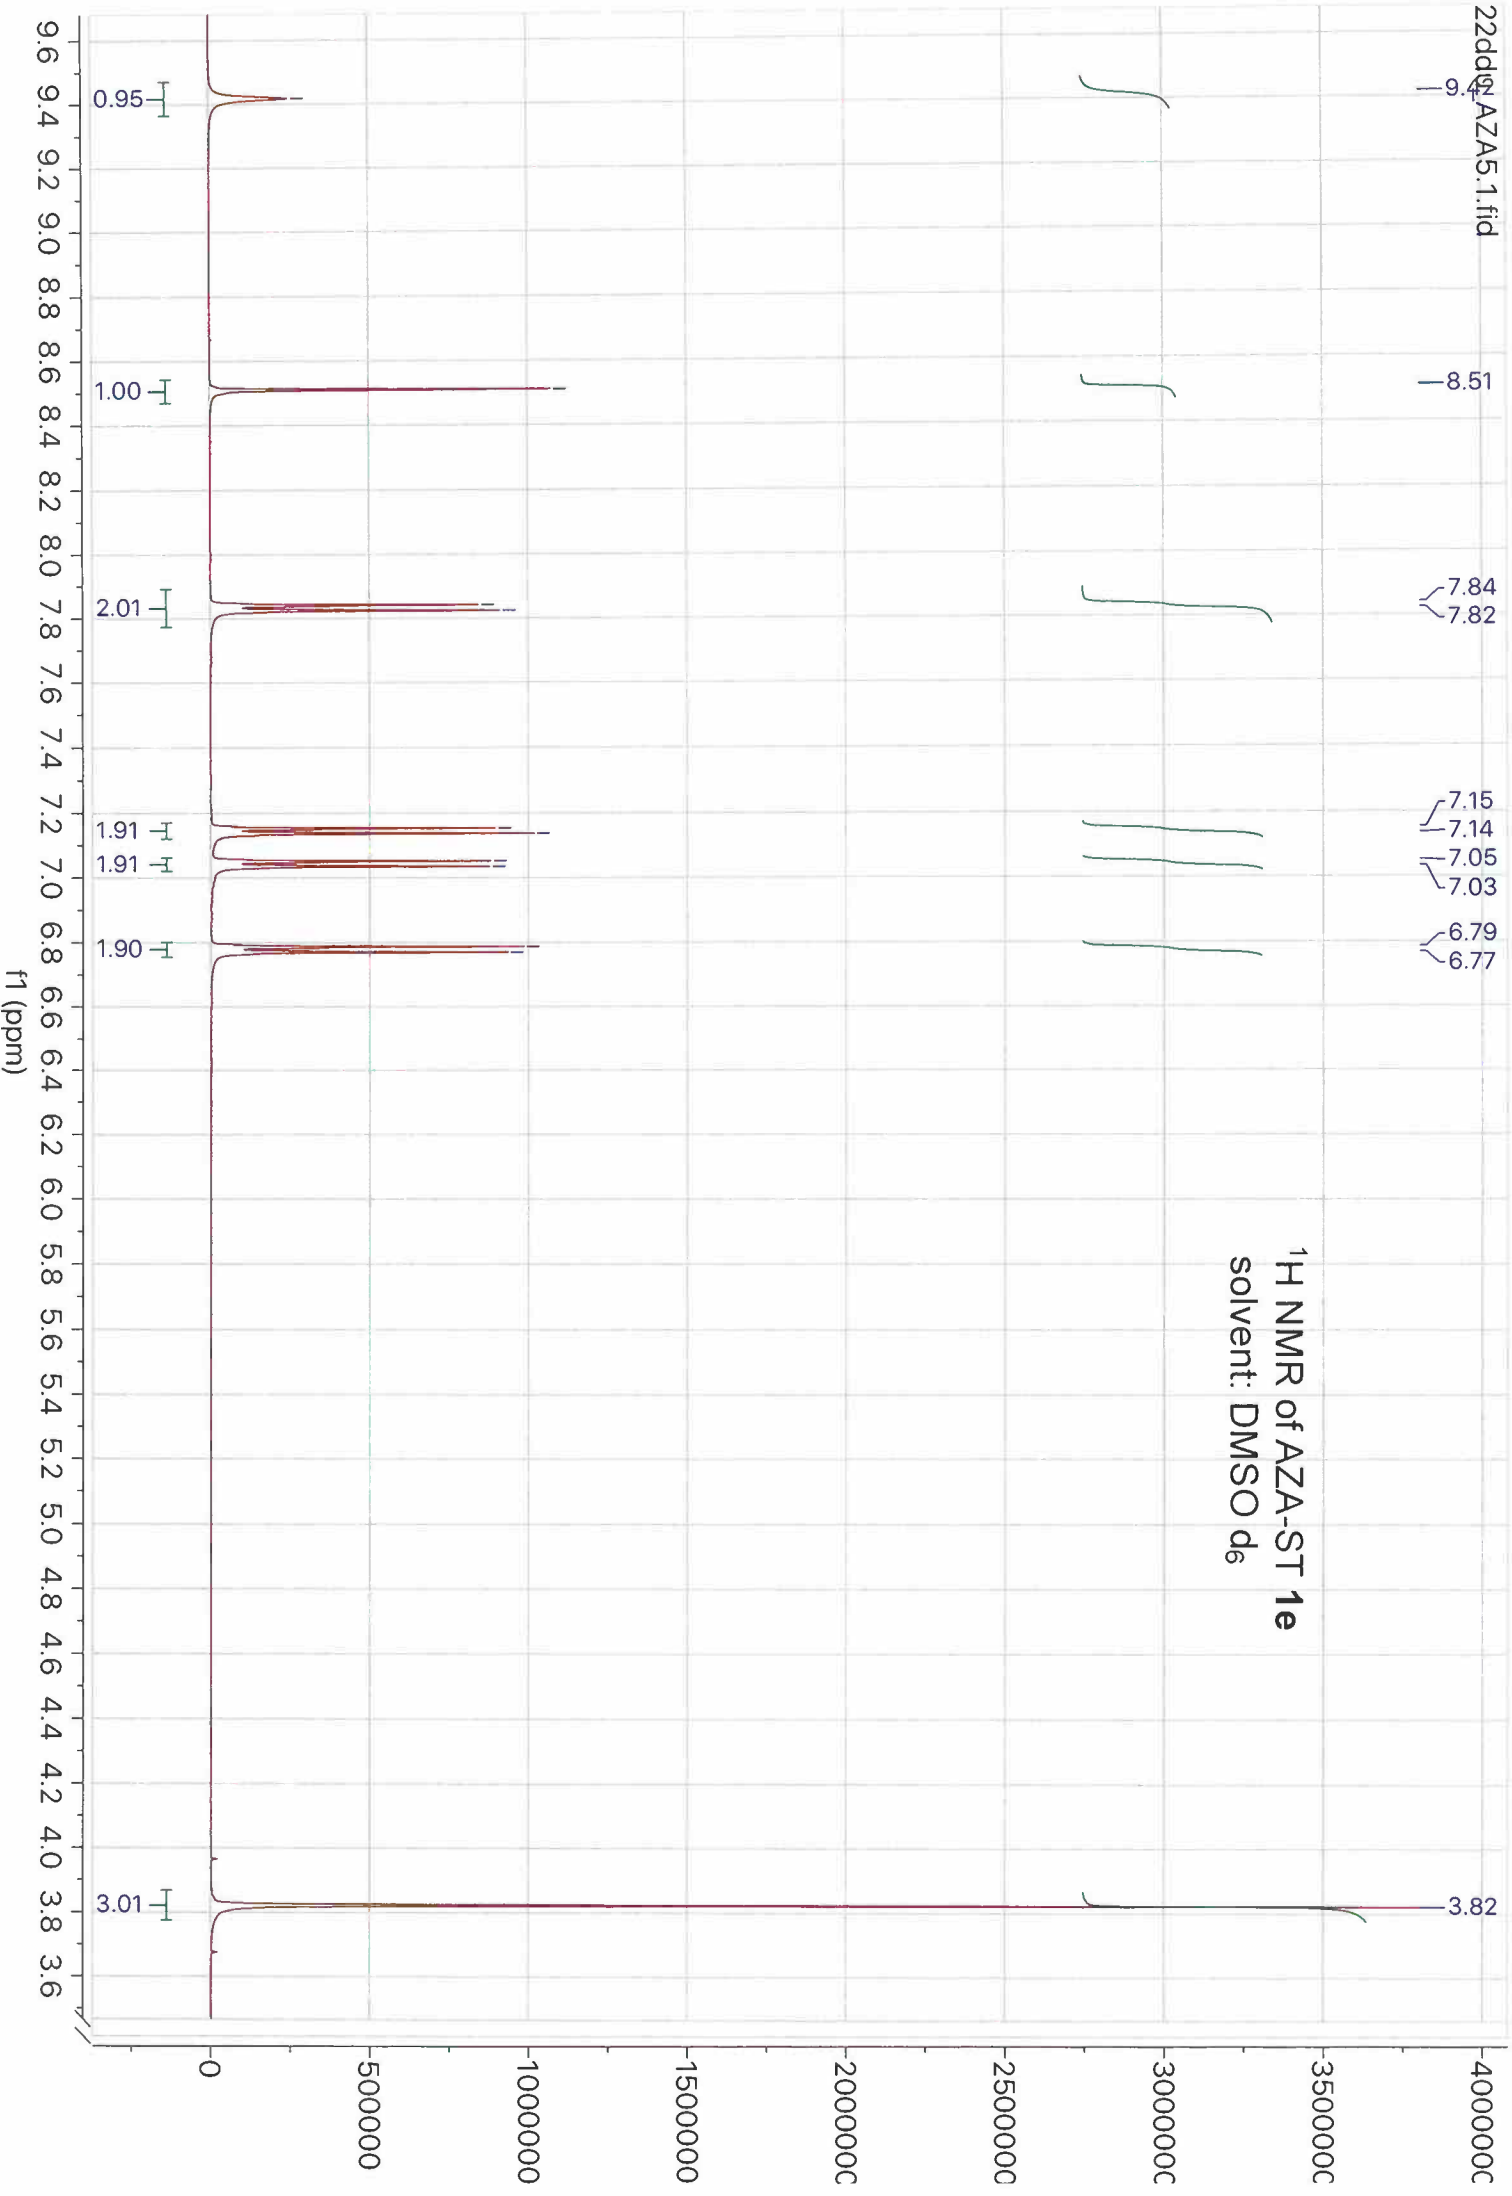

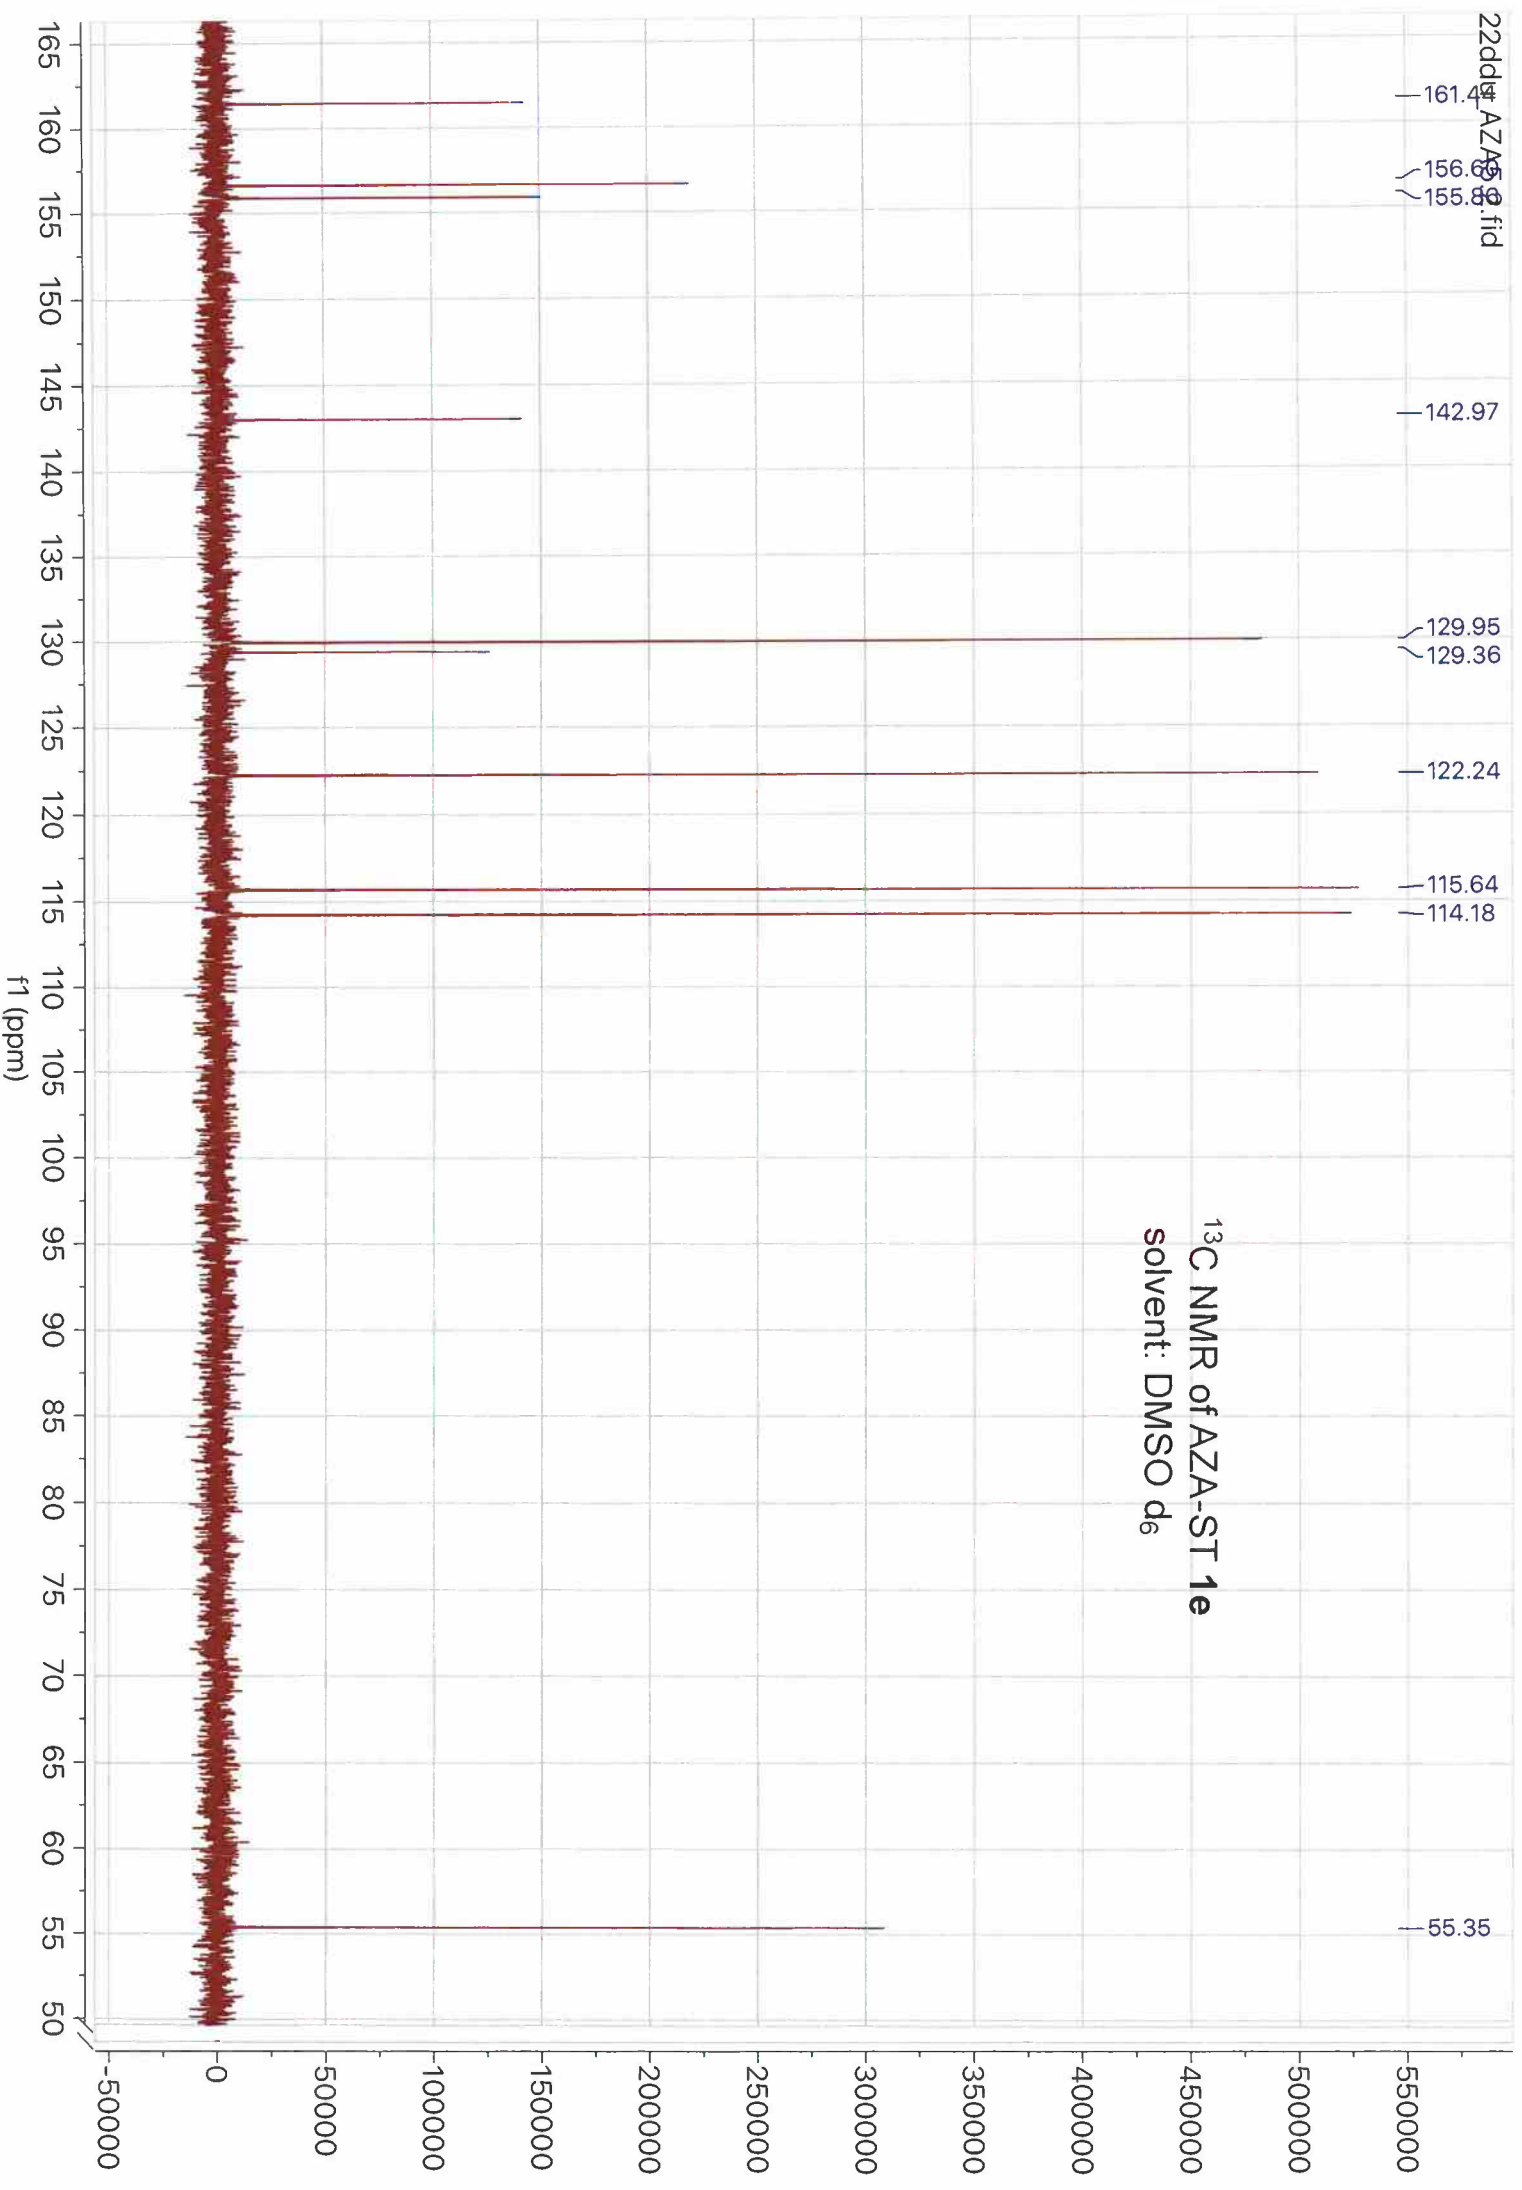

<sup>1</sup>H NMR of AZA-ST 1f  
solvent: DMSO d<sub>6</sub>

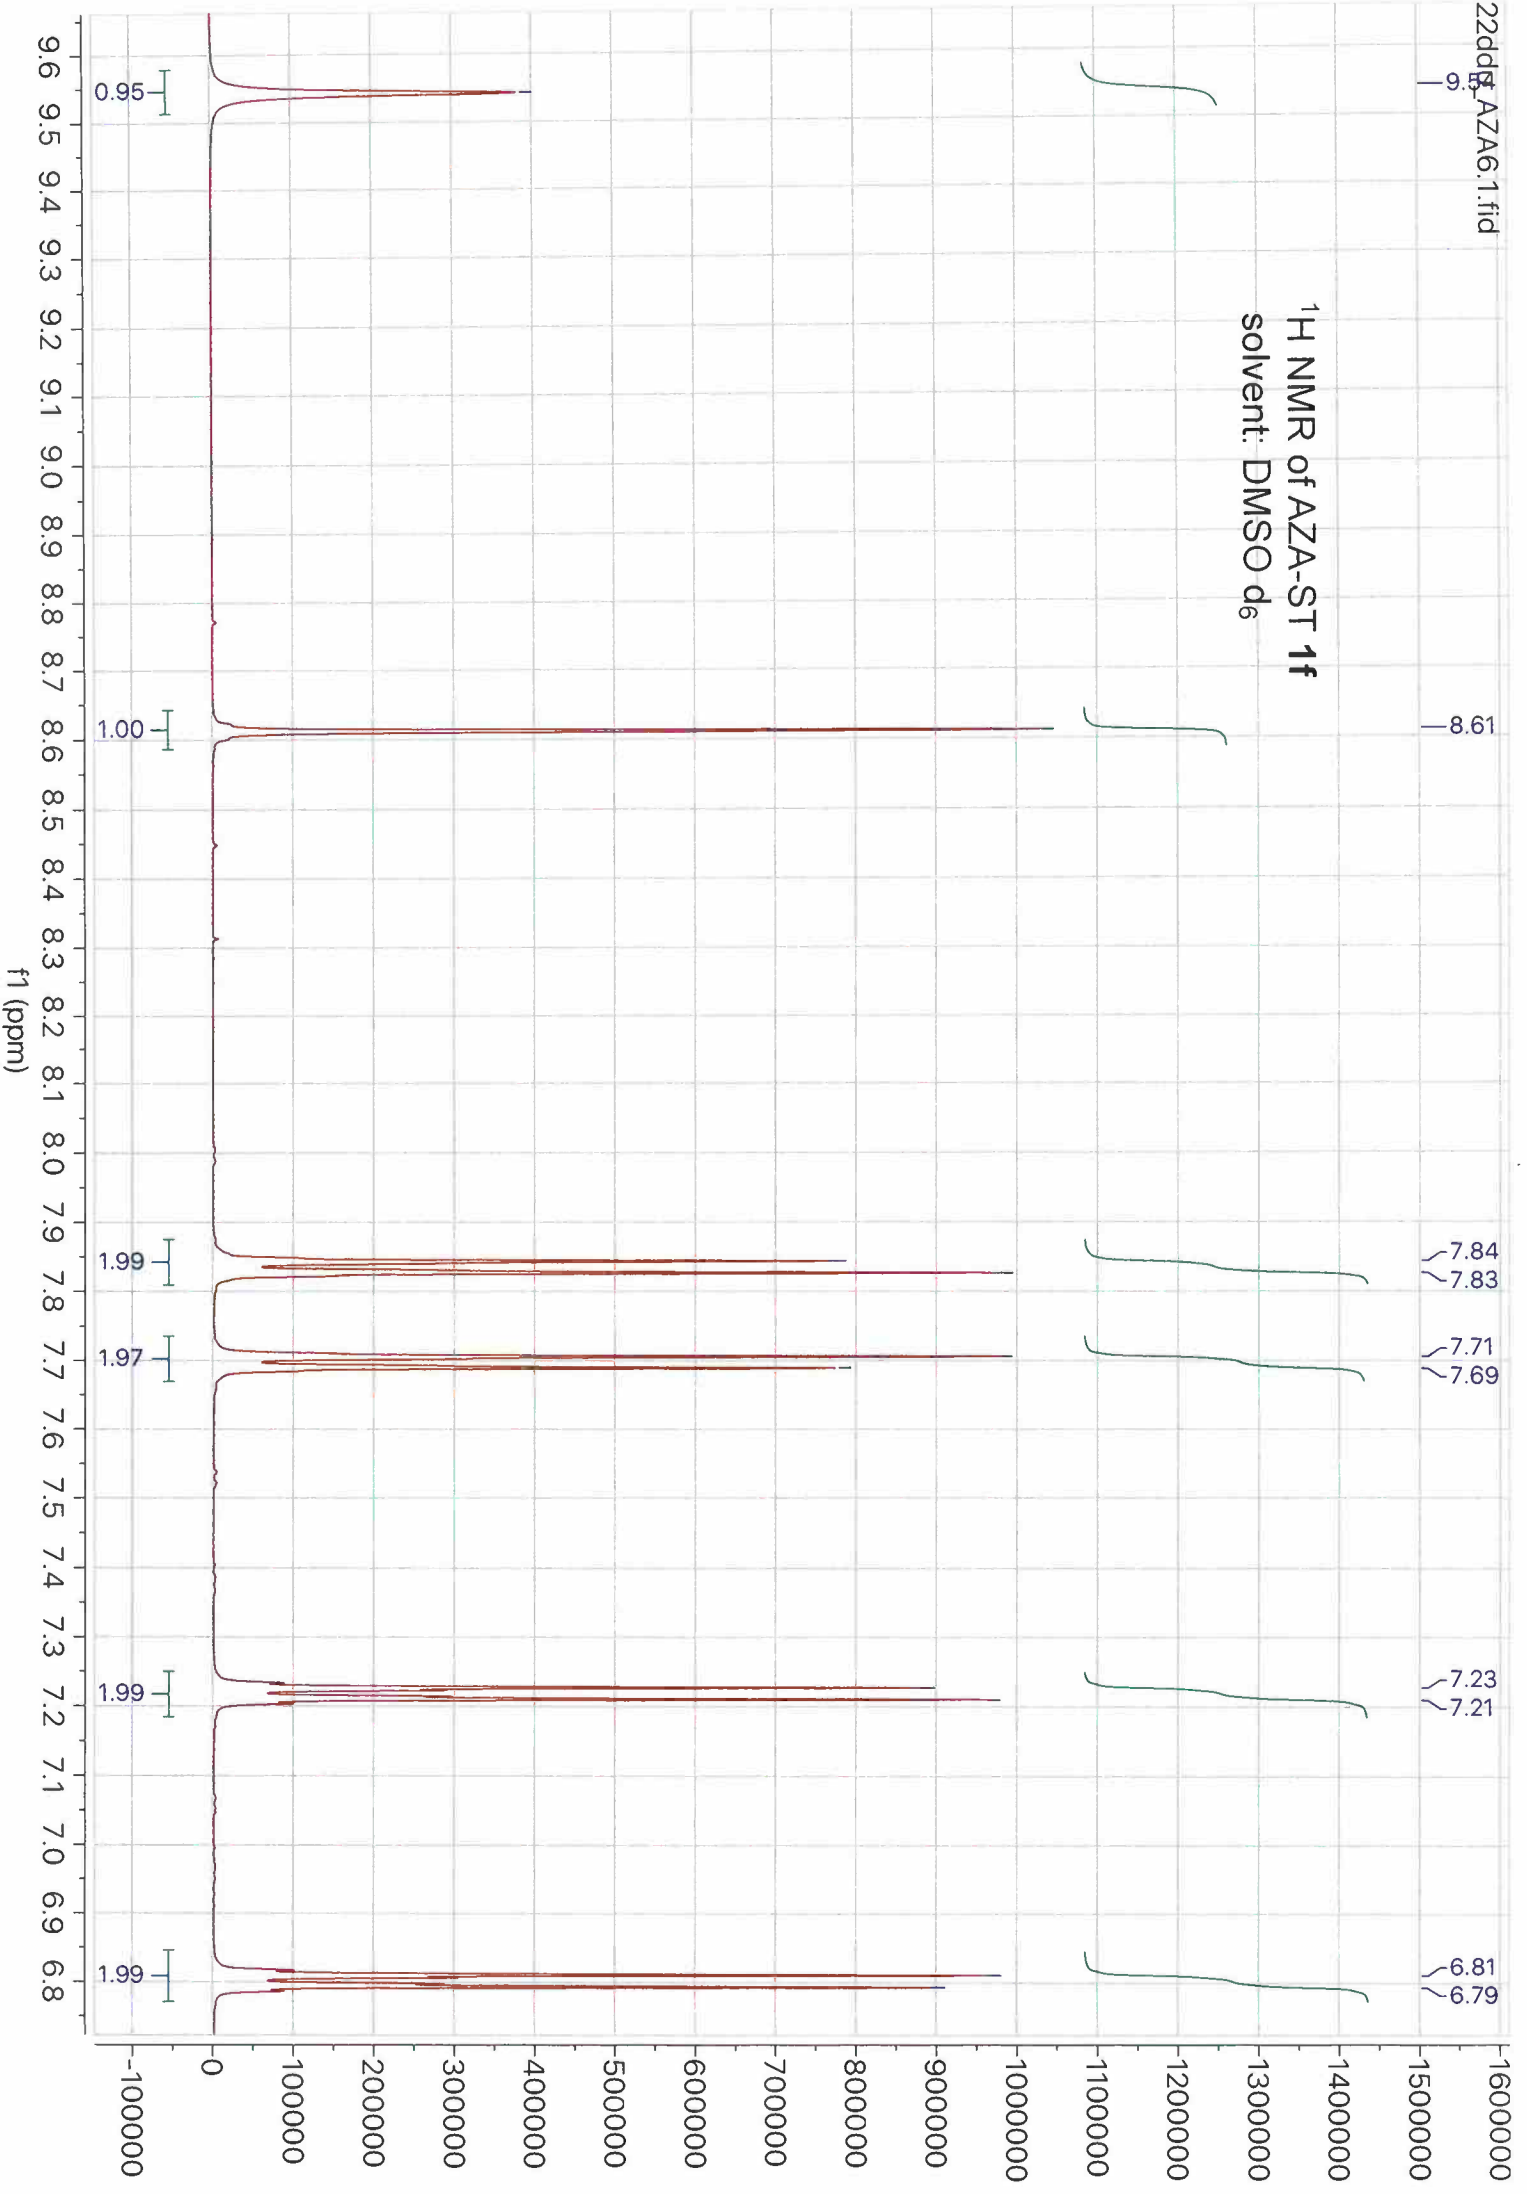

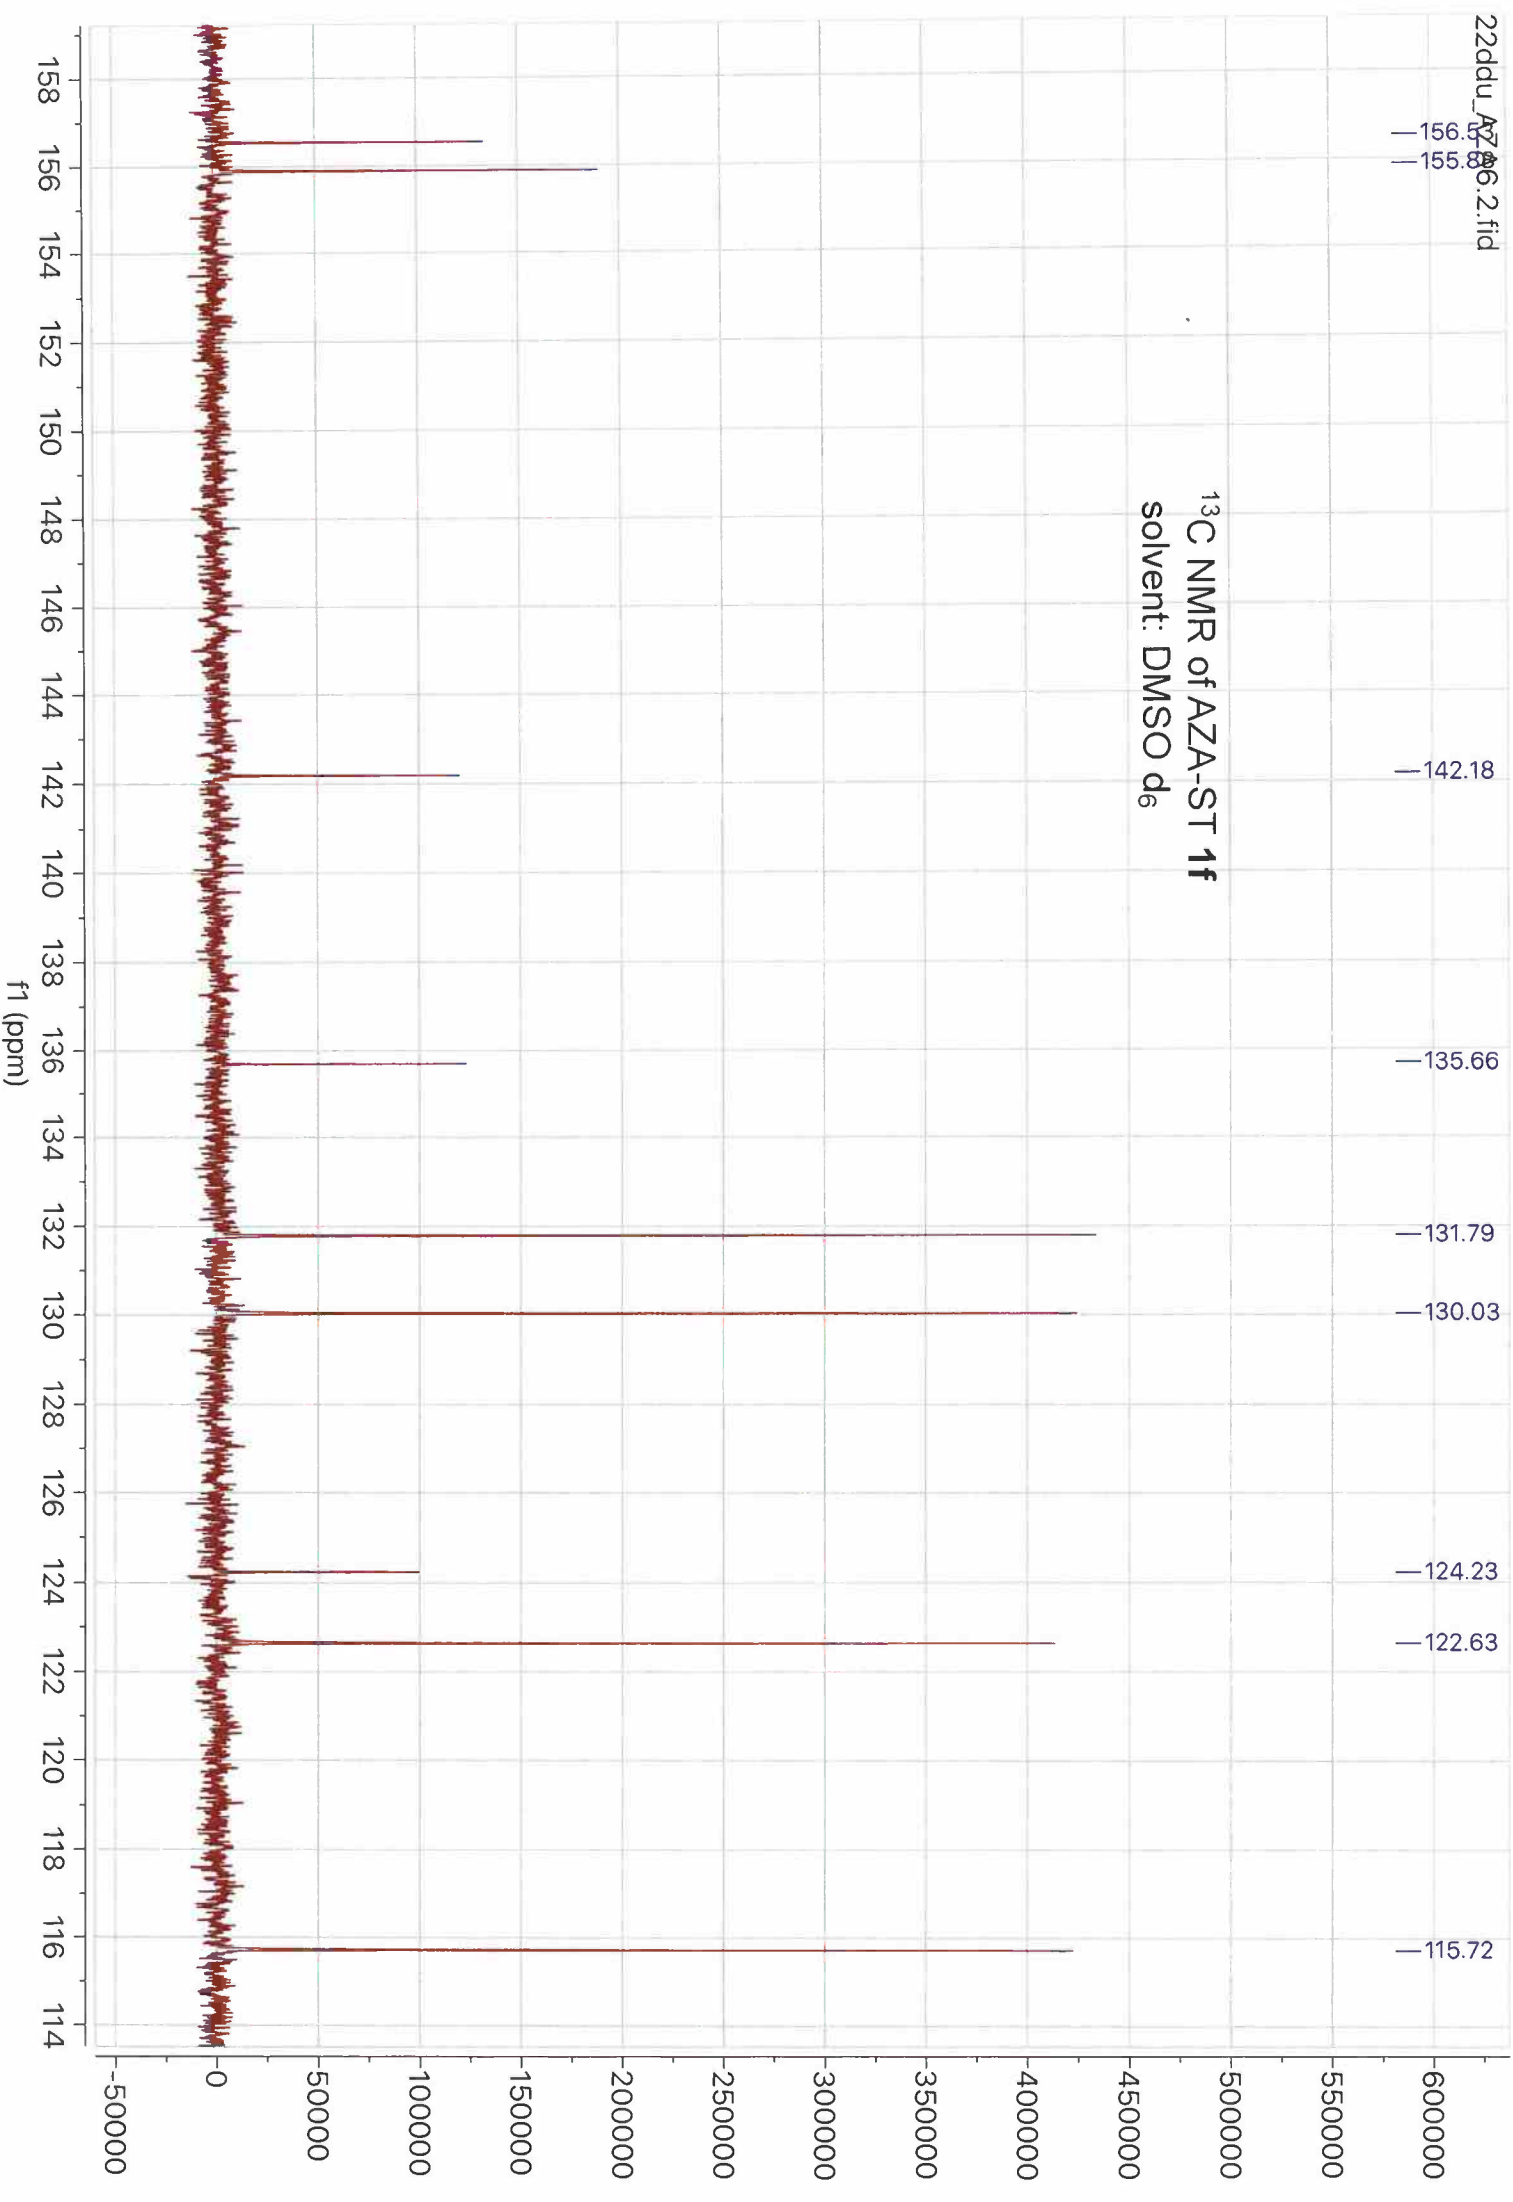

<sup>1</sup>H NMR of AZA-ST 1g  
solvent: DMSO d<sub>6</sub>

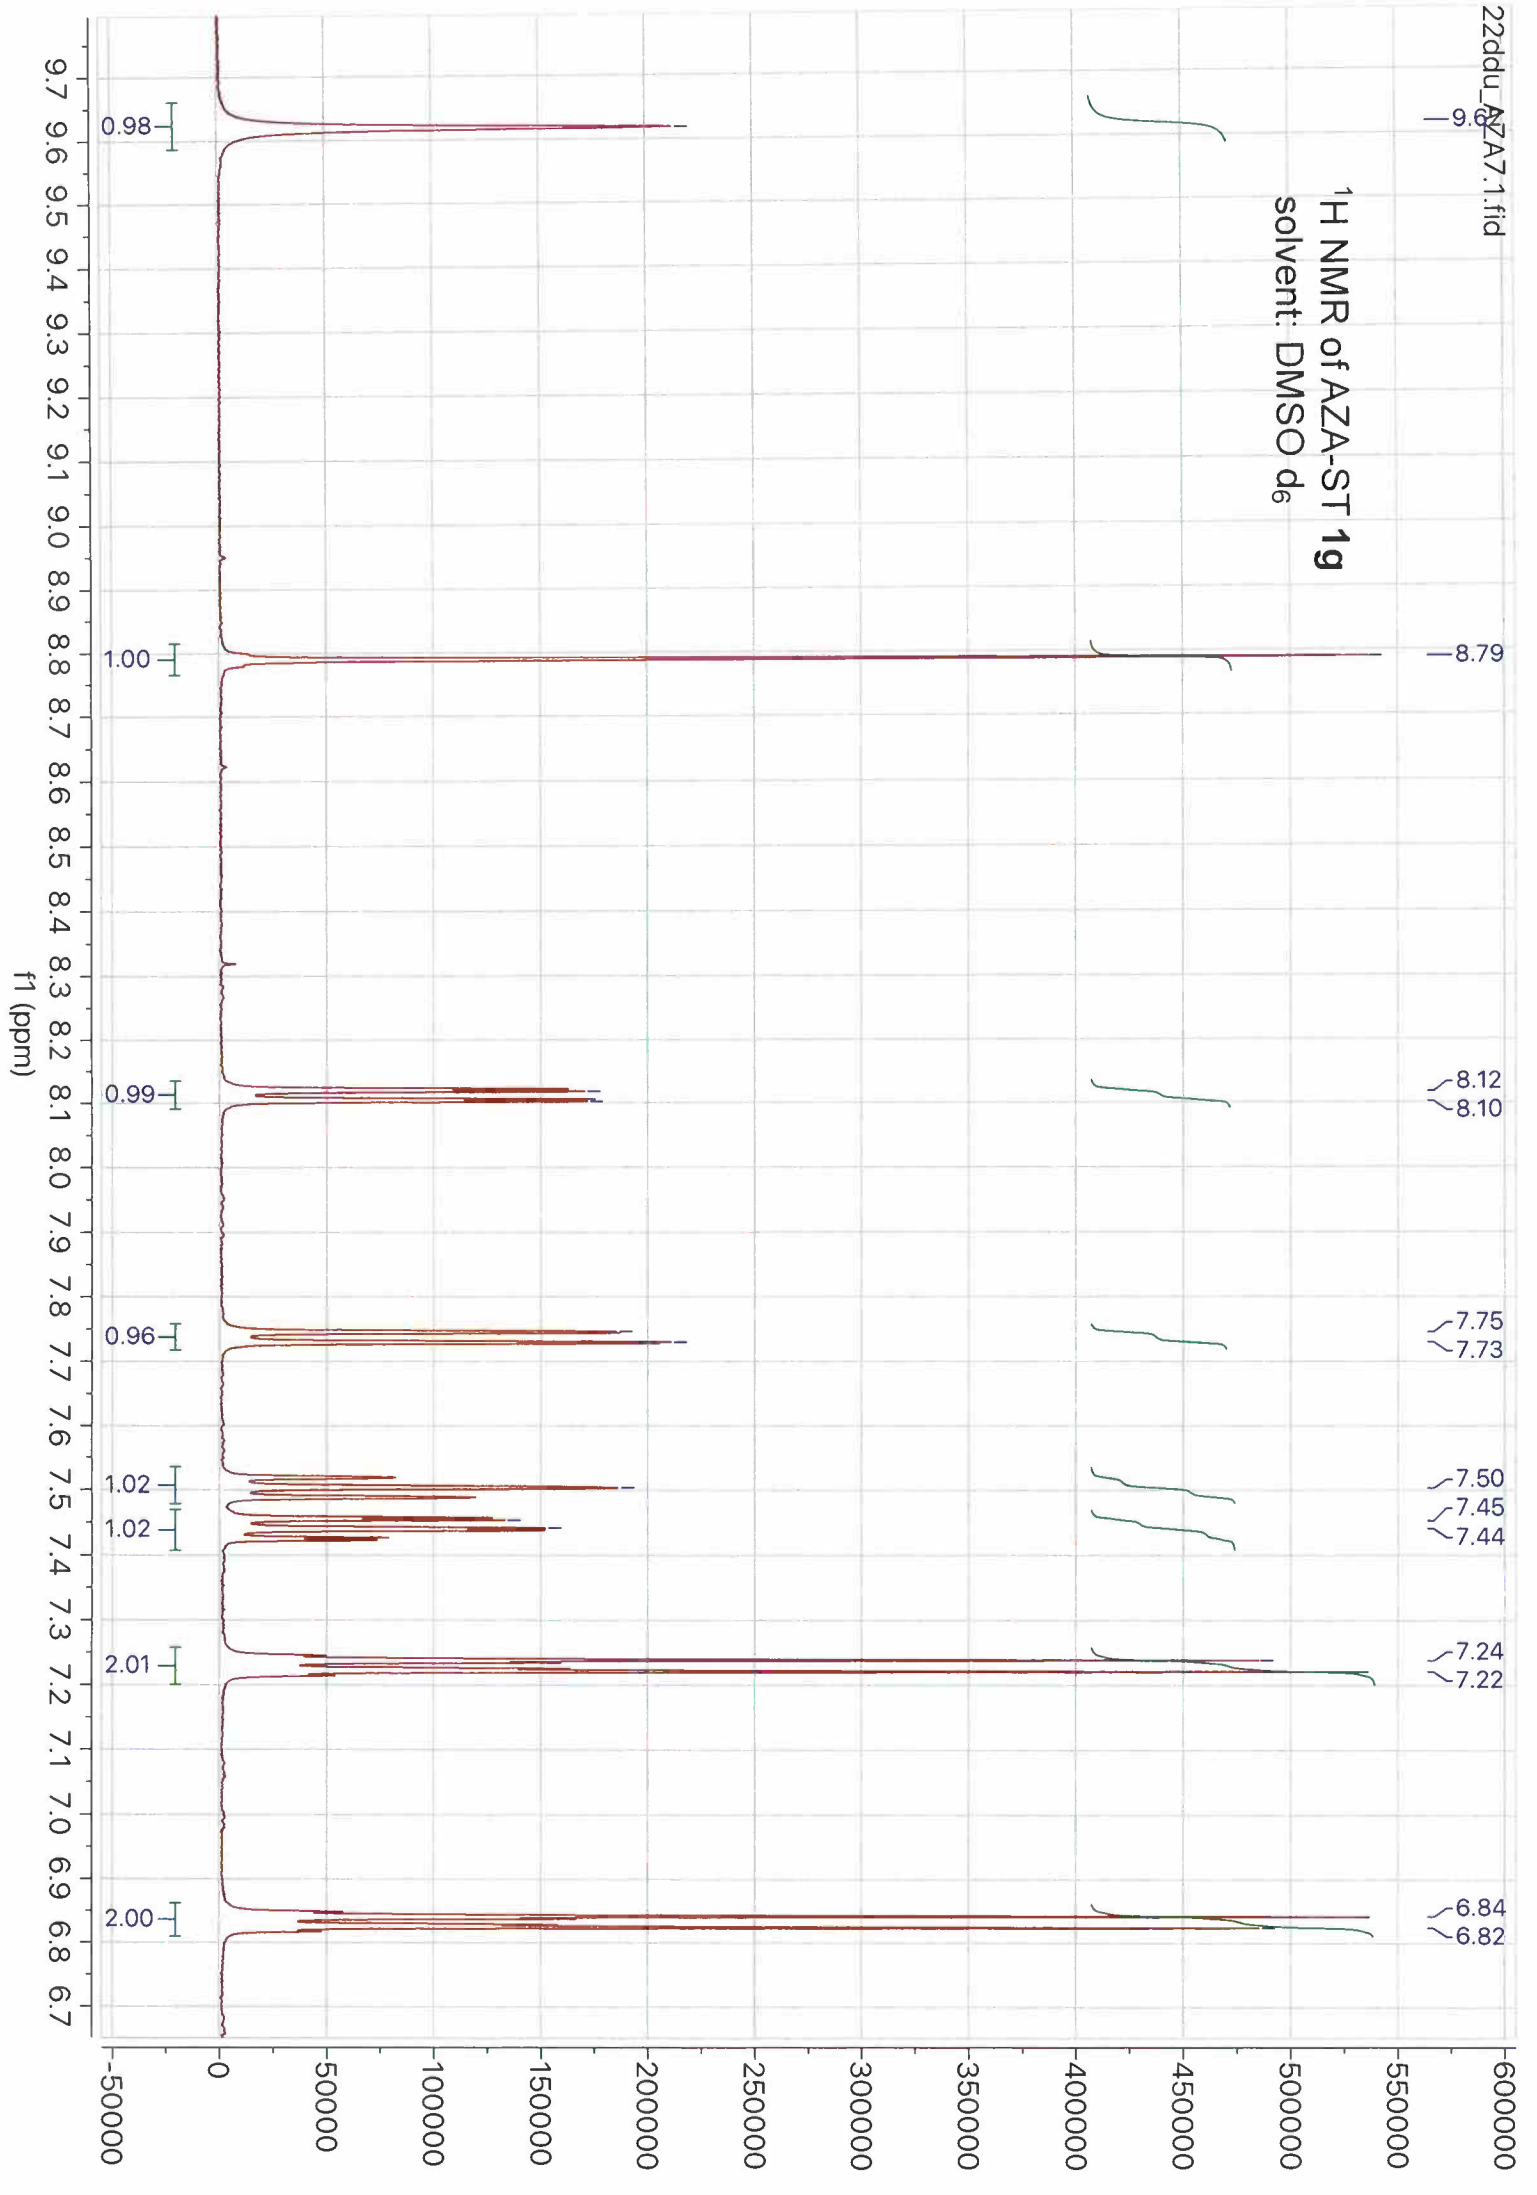

<sup>13</sup>C NMR of AZA-ST 1g  
solvent: DMSO d<sub>6</sub>

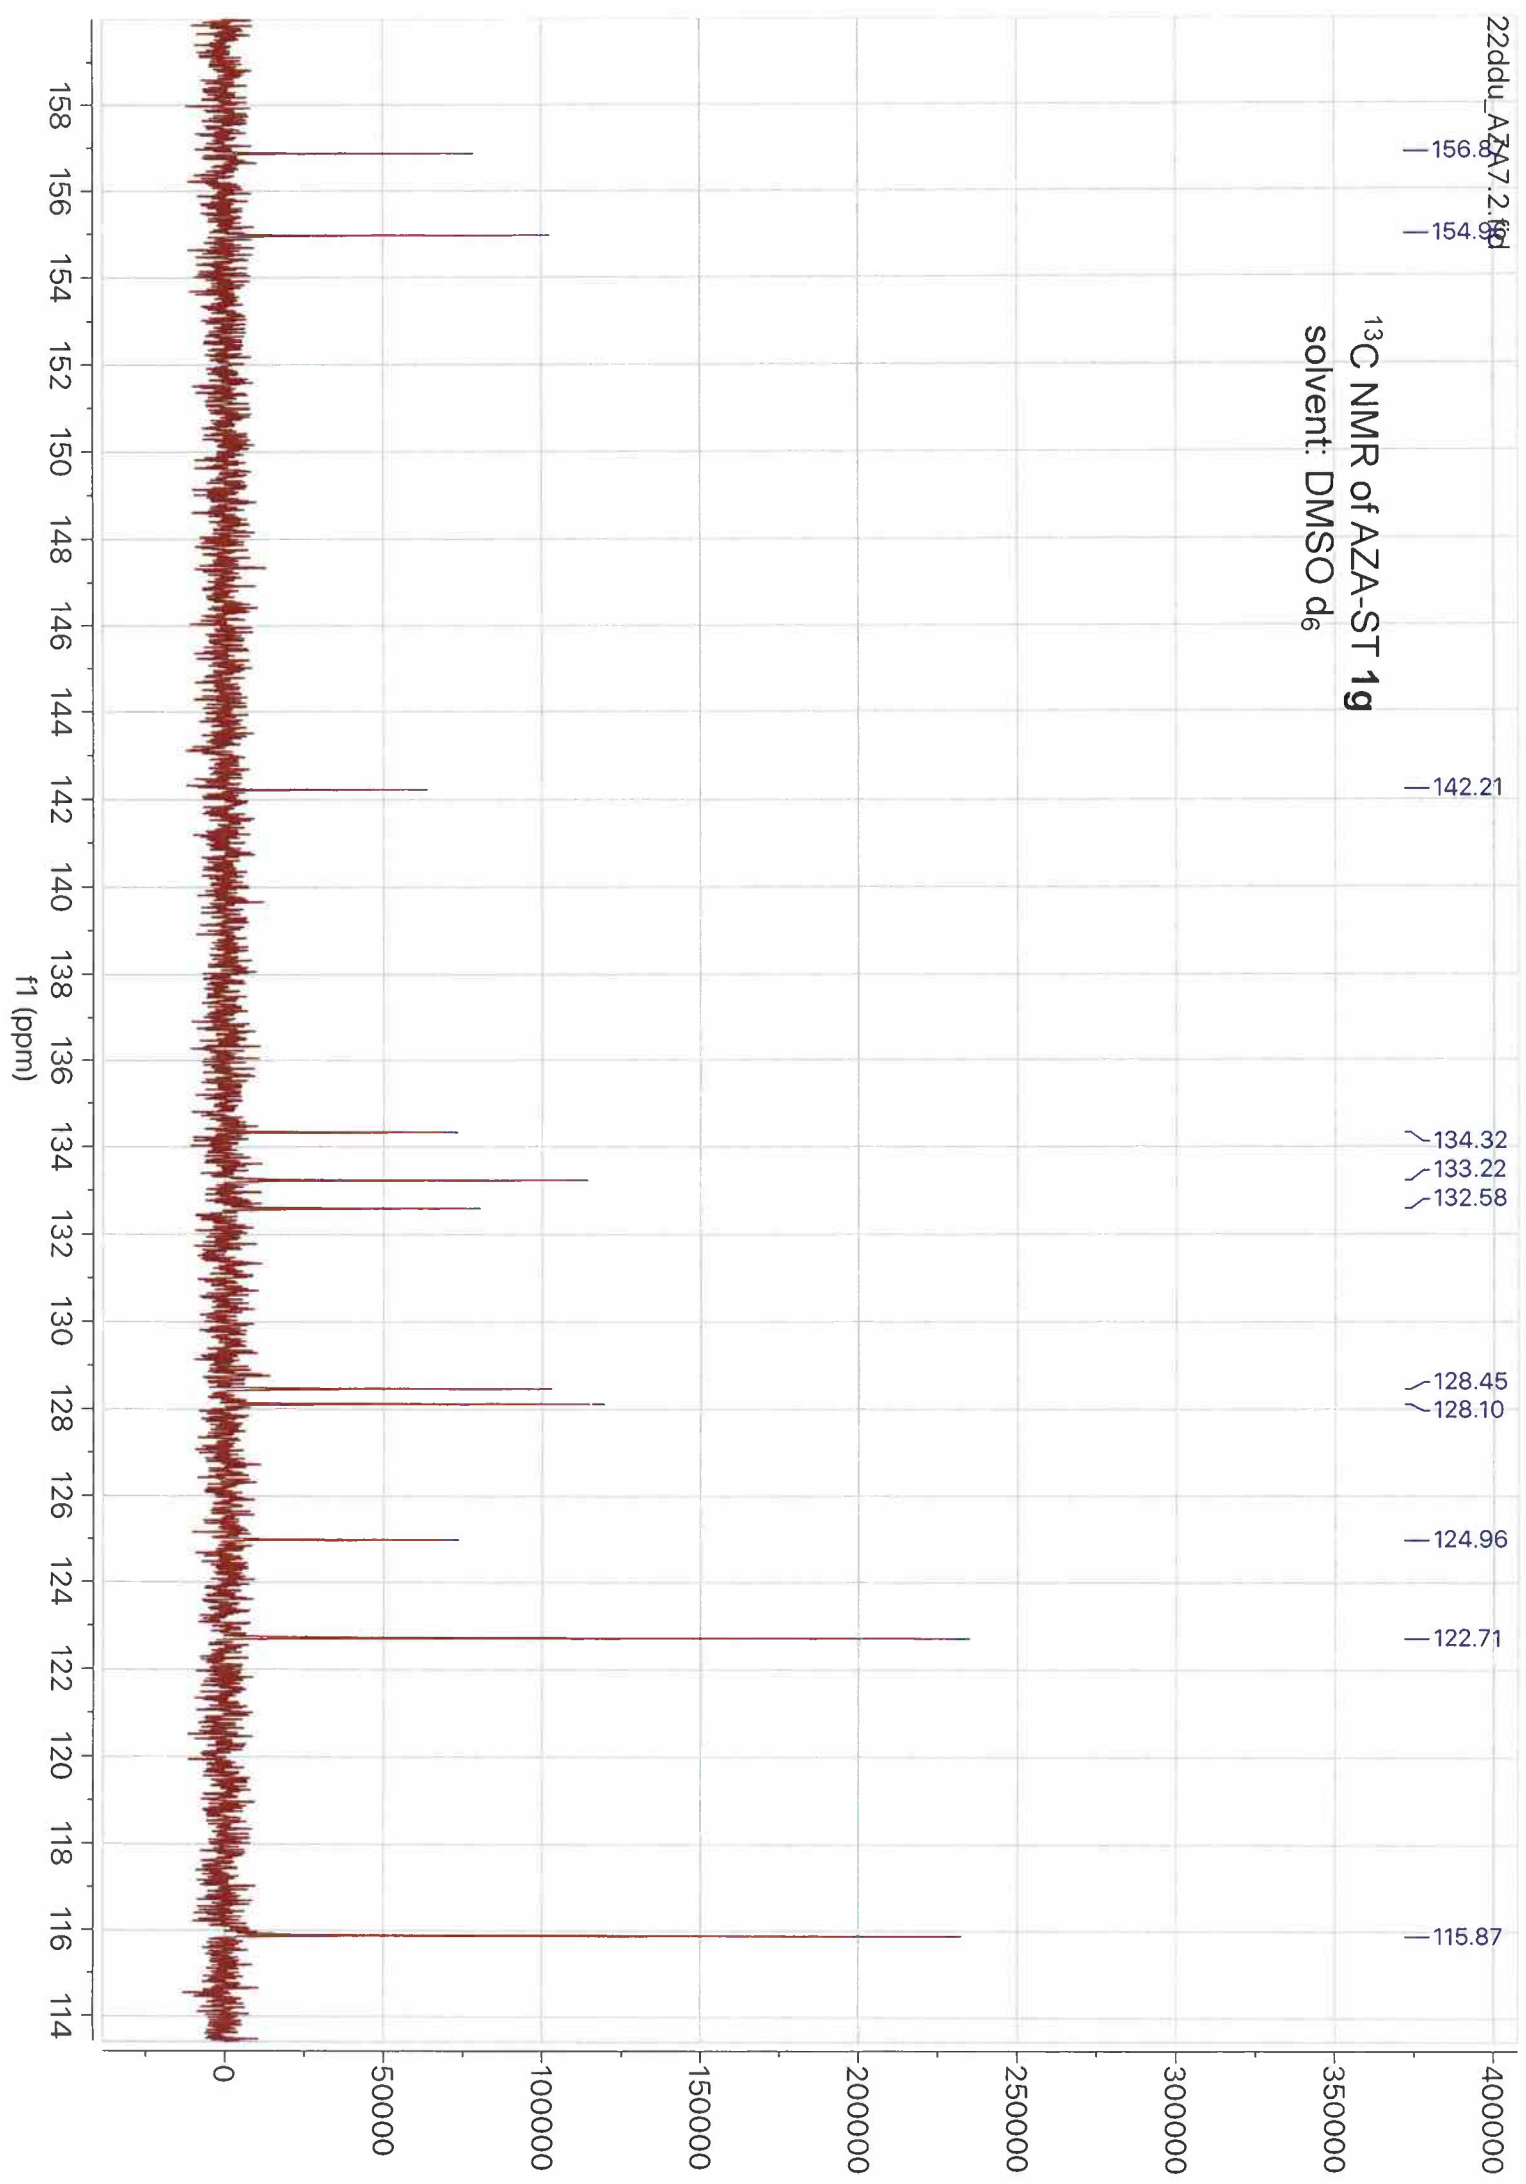



AZA-ST 1a

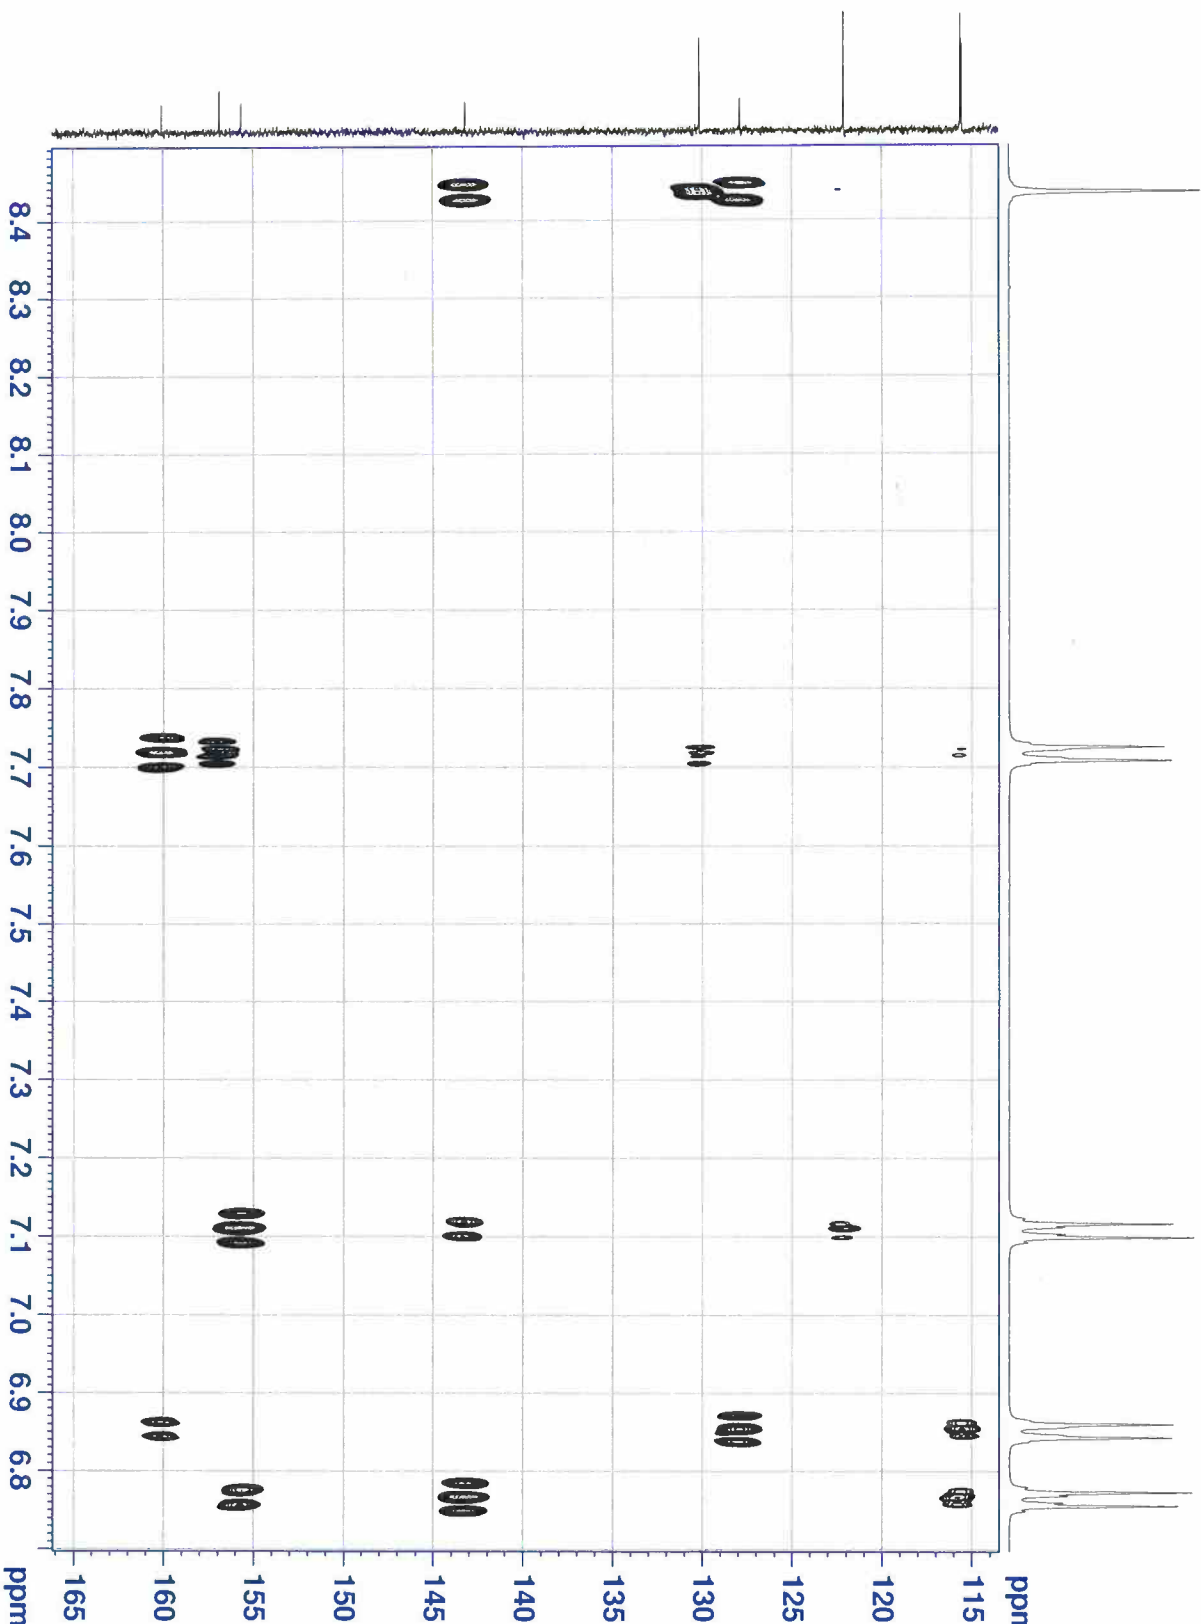

Current Data Parameters  
 NAME 22ddu\_AZ1  
 EXPNO 7  
 PROCNO 1

F2 - Acquisition Parameters  
 Date\_ 2020531  
 Time 21.23 h  
 INSTRUM Avance NEO  
 PROBRD 2167419\_0024 (1  
 PULPROG hmcpg1p043f  
 TD 4096  
 SOLVENT DMSO

NS 16  
 DS 16  
 SWH 4166.16 Hz  
 FIDRES 2.03455 Hz  
 AQ 0.1915200 sec  
 RG 101  
 DW 120.000 usec  
 DE 6.50 usec  
 TE 297.9 K

CNST12 145.0000000  
 CNST13 10.0000000  
 D0 0.0000000 sec  
 D1 0.0000000 sec  
 D2 0.0034828 sec  
 D3 0.0000000 sec  
 D16 0.0000000 sec  
 INO 0.00001809 sec  
 TDav 1  
 SF01 499.8729707 MHz  
 NUC1 1H  
 P1 9.73 usec  
 P2 19.46 usec  
 PLW1 32.1800031 W  
 SF02 125.7049807 MHz  
 NUC2 13C  
 P3 9.400 usec  
 PLW2 106.9300012 W  
 SF03 106.9300012 MHz  
 GP1 50.00 %  
 GP2 30.00 %  
 GP3 40.10 %  
 P16 1000.00 usec

===== F1 INDIRECT DIMENSION =====  
 tdl 128  
 sw\_f1 220.000000

F1 - Acquisition Parameters  
 TD 128  
 SF01 125.705 MHz  
 FIDRES 432.077423 Hz  
 SW 219.983 ppm  
 FWHM 0.40

F2 - Processing Parameters  
 SI 4096  
 SF 499.8700018 MHz  
 WDM 0 Hz  
 SSB 0 Hz  
 GB 0 Hz  
 PC 1.40

F1 - Processing Parameters  
 SI 1024  
 MC2 0.40  
 SF 125.6924703 MHz  
 WDM 0 Hz  
 SSB 0 Hz  
 GB 0 Hz

A2A-ST 1b

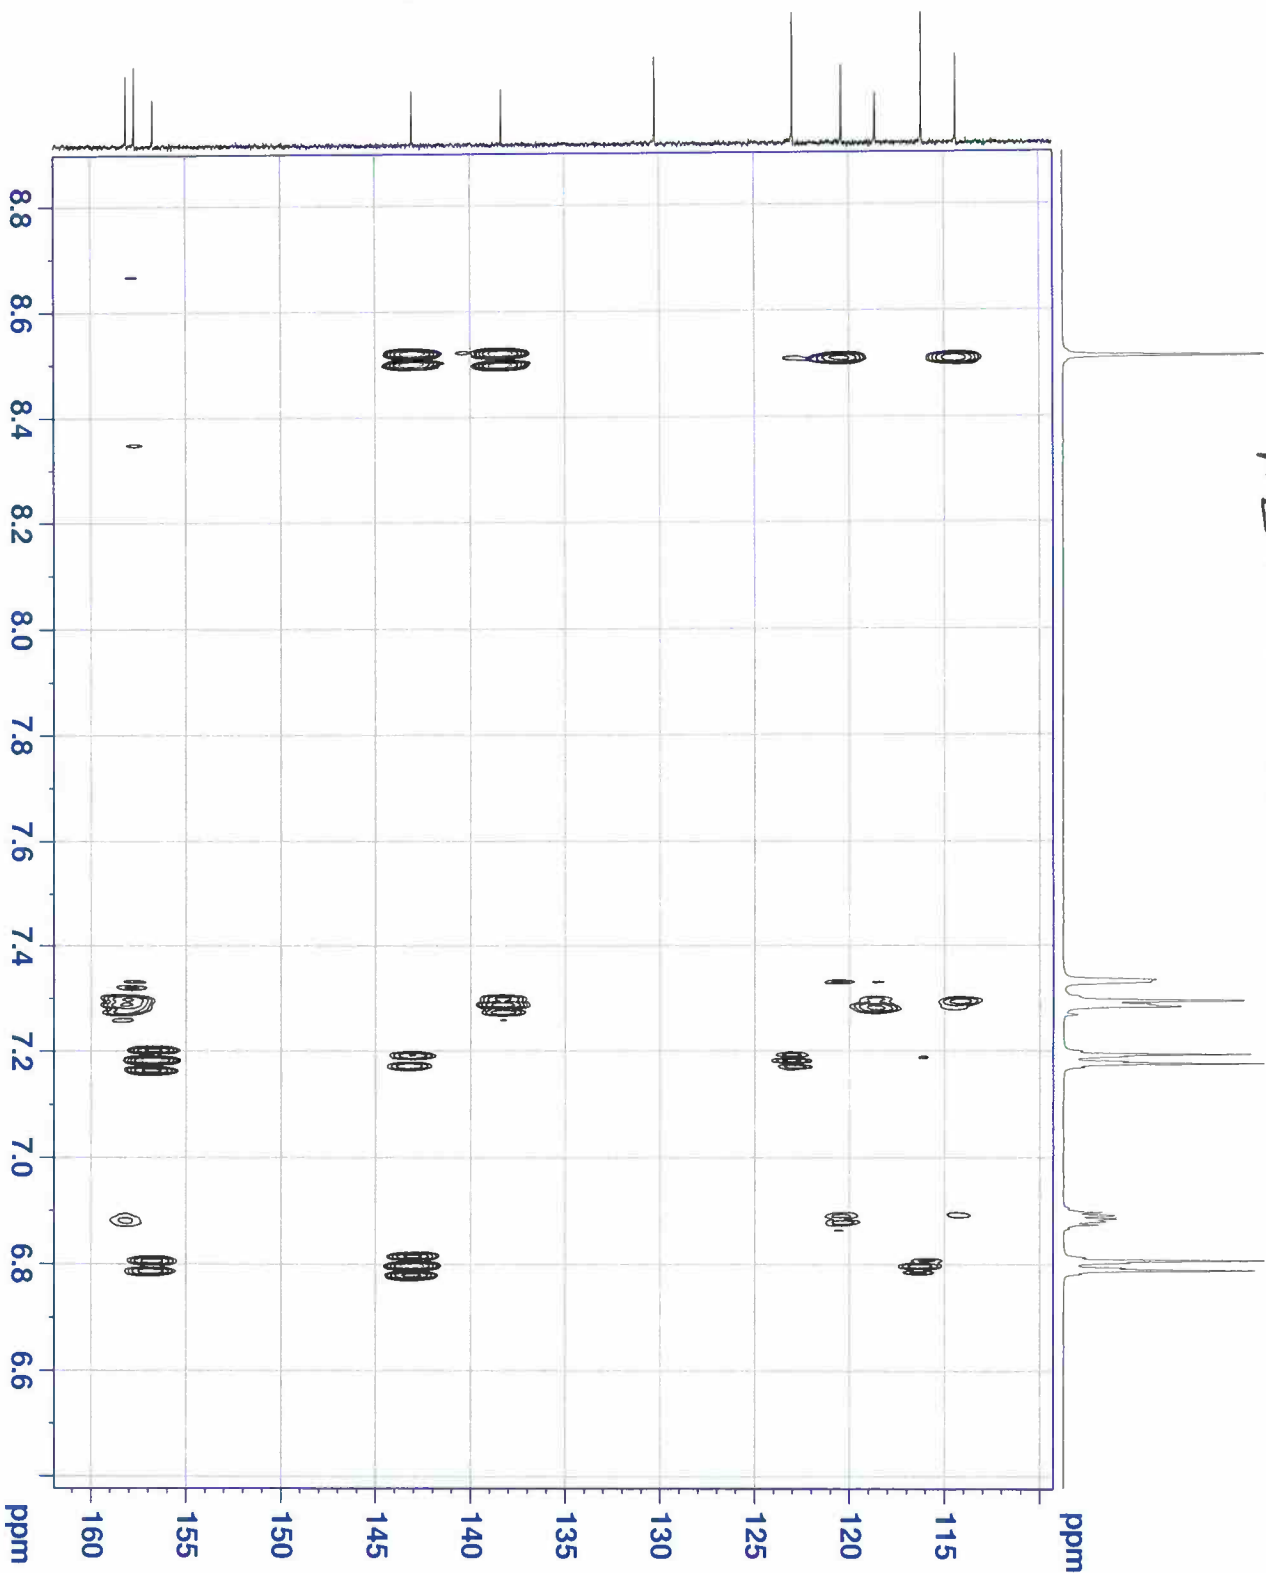

Current Data Parameters  
NAME 22601\_A2A  
EXNO 7  
PROCNO 1

F2 - Acquisition Parameters  
Date\_ 20220531  
Time 23.41 h  
INSTRUM Avance NEO  
PROBHD Z167419\_0024 (1  
PULPROG hmczgprp04g  
FIDRES 4036  
SOLVENT DMSO  
NS 16  
DS 16  
SWH 5263.158 Hz  
FIDRES 2.569901 Hz  
AQ 0.3891200 sec  
RG 101  
DW 95.000 usec  
DE 6.50 usec  
TE 297.9 K  
CNS12 145.000000  
D9113 10.0000300 sec  
D1 1.5000000 sec  
D2 0.00344828 sec  
D6 0.0500000 sec  
D16 0.0002000 sec  
IN0 0.0001809 sec  
TDav 1  
SF01 499.872683 MHz  
NUC1 1H  
F1 9.73 usec  
P1 18.46 usec  
PLW1 32.1800031 MHz  
SF02 125.7049807 MHz  
NUC2 13C  
P3 9.00 usec  
PLW2 106.9300031 MHz  
GPMAM[1] SMSQ10.100  
GP21 50.00 %  
GPMAM[2] SMSQ10.100  
GP22 30.00 %  
GPMAM[3] SMSQ10.100  
PF23 1000.00 usec  
P16

F1 INDIRECT DIMENSION  
c1 128  
sw\_f1 220.000000

F1 - Acquisition parameters  
TD 128  
SF01 125.705 MHz  
FIDRES 432.077423 Hz  
SFO1 219.983 ppm  
FMODE QF

F2 - Processing parameters  
SI 4096  
SF 499.8700000 MHz  
WDW OSINE  
SSB 0  
LB 0 Hz  
GB 0  
PC 1.40

F1 - Processing parameters  
SI 1024  
MC2 OF  
SF 125.6924115 MHz  
WDW OSINE  
SSB 0  
LB 0 Hz  
GB 0

AZA-ST 1c

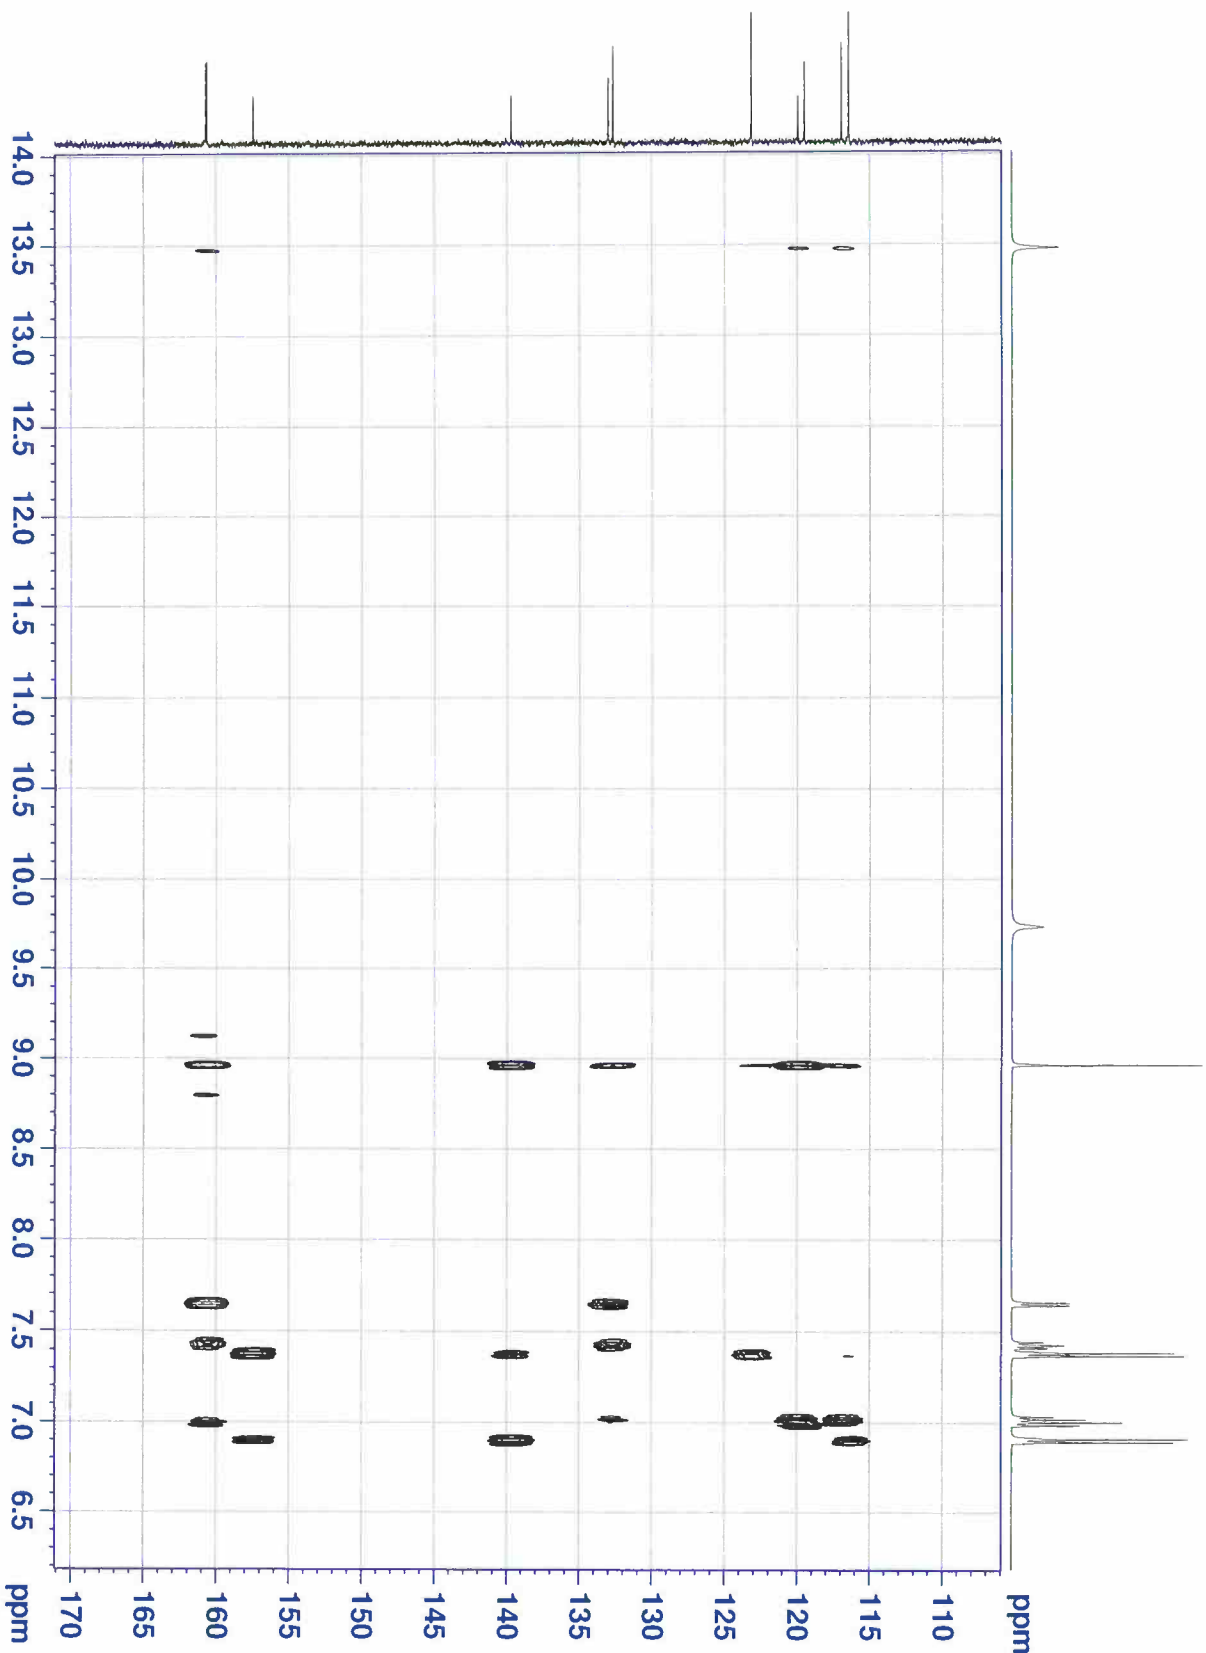

Current Data Parameters  
 NAME 22dat\_AZAJ  
 EXPNO 7  
 PROCNO 1  
 F2 - Acquisition Parameters  
 Date\_ 20220601  
 Time 1.56 h  
 INSTRUM Avance NEO  
 PROBDH 2167419.0024 (f  
 PULPROG hmbcsp1pndqf  
 TD 4096  
 SOLVENT DMSO  
 NS 16  
 DS 16  
 SWH 7462.687 Hz  
 FIDRES 3.2744320 sec  
 AQ 0.2744320 sec  
 RG 101  
 DW 67.000 usec  
 DE 6.50 usec  
 TE 297.9 K  
 CNST12 145.0000000  
 CNST13 10.0000000  
 D0 0.0000000  
 D1 0.0000000 sec  
 D2 0.00344828 sec  
 D3 0.0000000 sec  
 D16 0.0000000 sec  
 INO 0.00001809 sec  
 TDav 1  
 SFOL 499.8736528 MHz  
 NUC1 1H  
 P1 9.73 usec  
 P2 19.46 usec  
 PLW1 32.1800031 W  
 SF02 125.7049807 MHz  
 NUC2 13C  
 P3 9.00 usec  
 P4 106.9300001 W  
 GPVAM[1] SMSQ10.100  
 GPVAM[2] SMSQ10.100  
 GPVAM[3] SMSQ10.100  
 GP22 30.00 %  
 GP23 40.10 %  
 P16 1000.00 usec  
 F1 INDIRECT DIMENSION  
 tdl\_f1 128  
 sw\_f1 220.000000  
 F1 - Acquisition Parameters  
 TD 128  
 SF01 125.705 MHz  
 FIDRES 432.077423 Hz  
 SW 219.983 ppm  
 FMODE QF  
 F2 - Processing Parameters  
 SI 4096  
 SF 499.8699721 MHz  
 NMRB QF  
 SSB 0 Hz  
 LB 0  
 GB 0  
 PC 1.40  
 F1 - Processing Parameters  
 SI 1024  
 MC2 QF  
 SF 125.6924115 MHz  
 MDW QF  
 SSB 0 Hz  
 LB 0  
 GB 0



# AZA-ST Ac

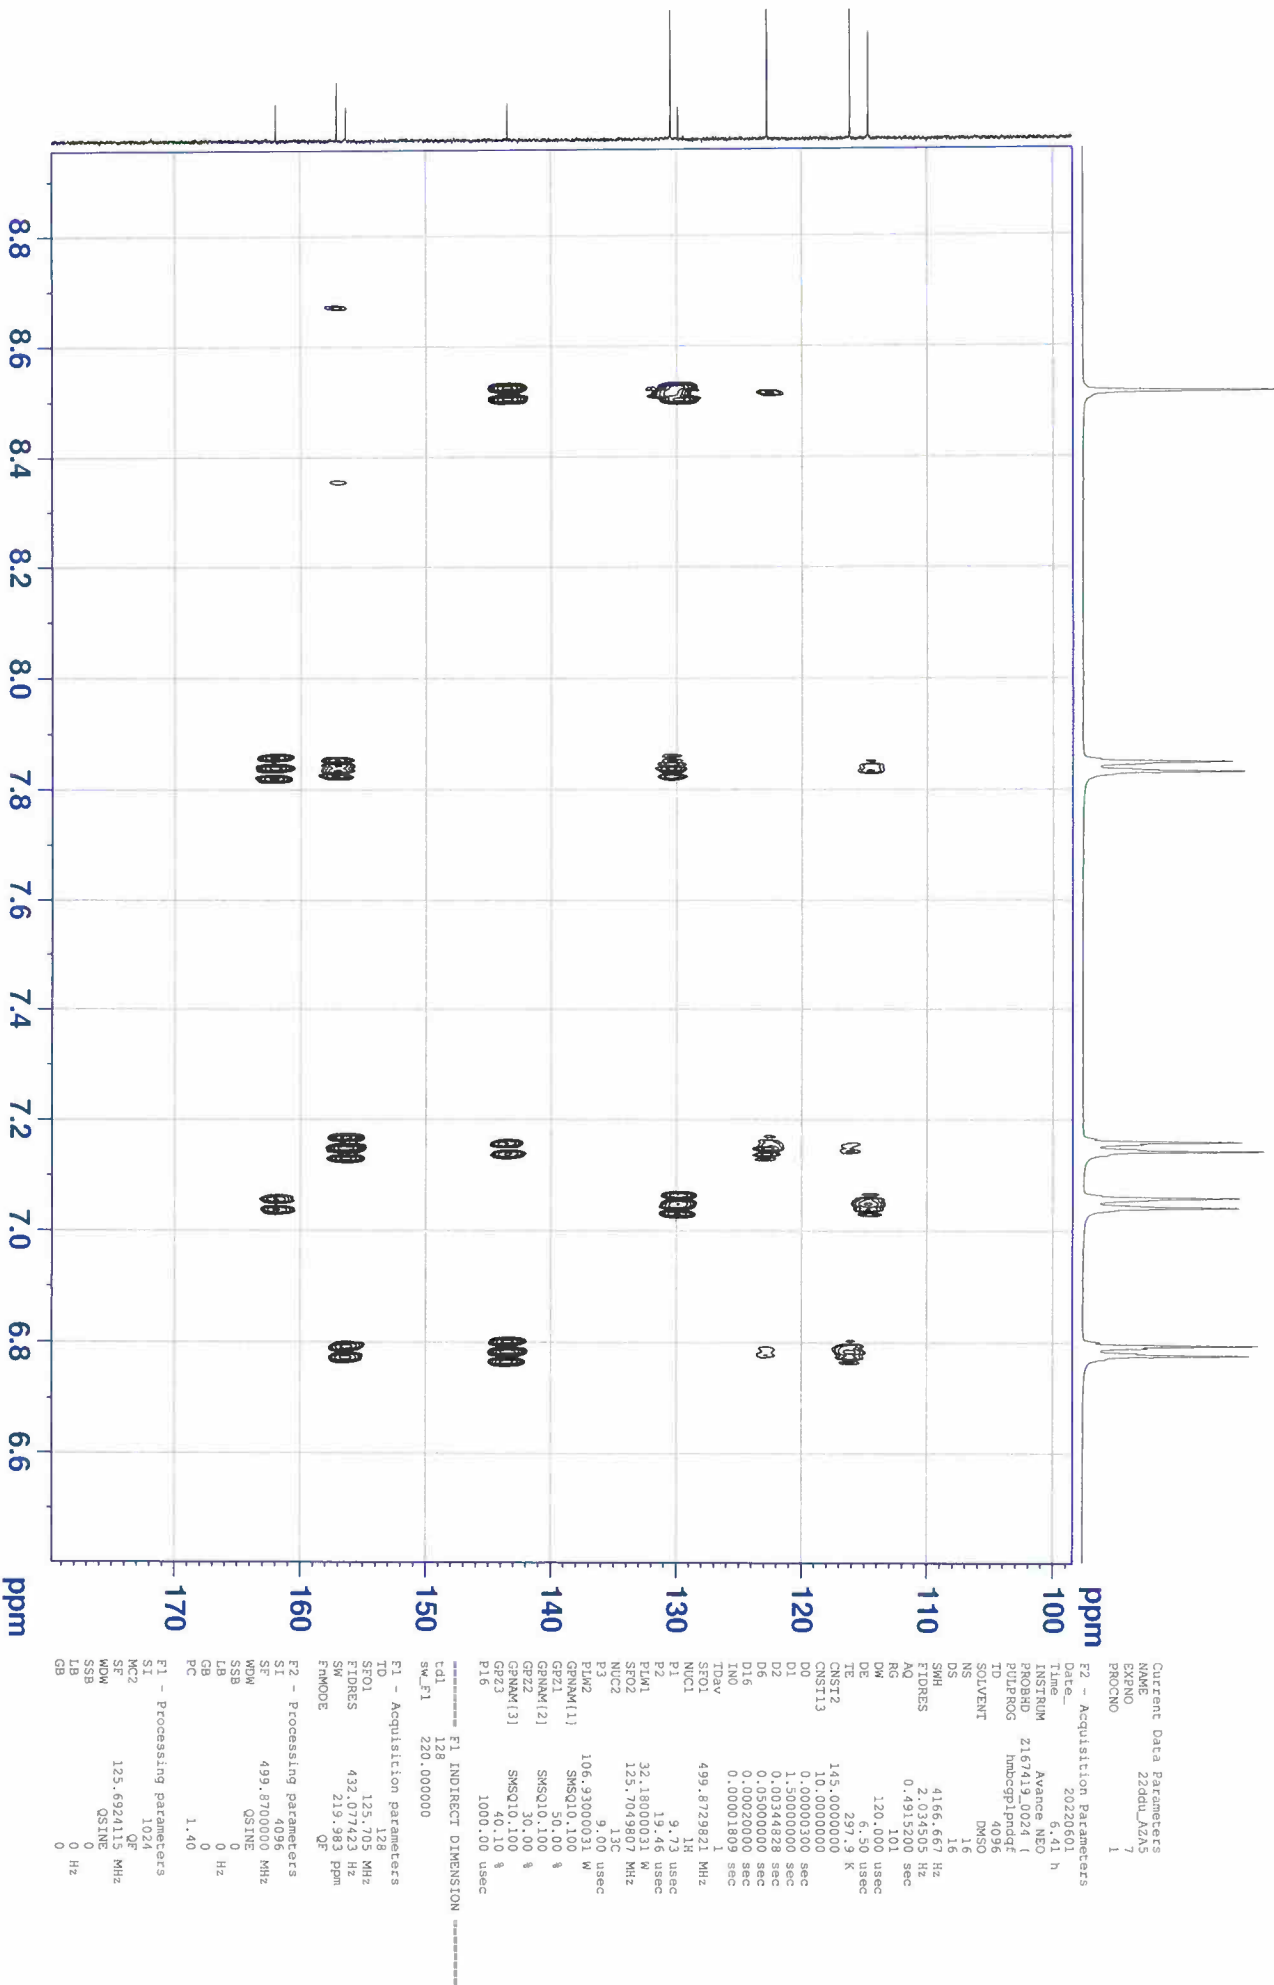

| Current Data Parameters |            |
|-------------------------|------------|
| NAME                    | 22ddu_AZA6 |
| EXPNO                   | 7          |
| PROCNO                  | 1          |

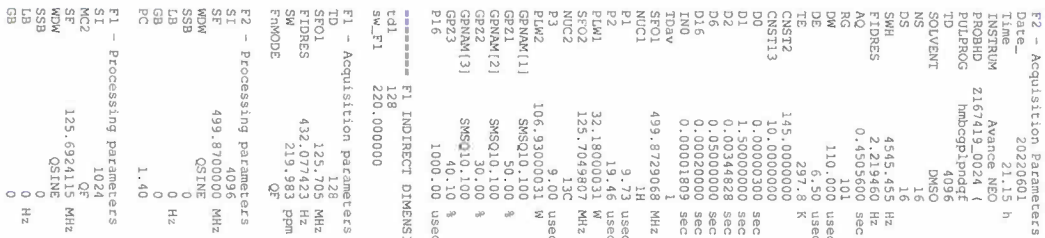

|       |                             |  |                            |                |                            |
|-------|-----------------------------|--|----------------------------|----------------|----------------------------|
|       | F1 - Acquisition parameters |  | F1 - Processing parameters |                | F1 - Processing parameters |
| Td    | 18 Hz                       |  | SF                         | 4096           | OF                         |
| SFO1  | 525.705 MHz                 |  | SE                         | 499.870000 Mhz | 125.692415 Mhz             |
| EIDRS | 432.077423 Hz               |  | WDW                        | GSSINE         | GSSINE                     |
| SW    | 219.983 psm                 |  | SSB                        | 0              | 0 Hz                       |
| FMODE | QF                          |  | Lb                         | 0 Hz           | 0 Hz                       |
|       |                             |  | GB                         | 0              | 0                          |
|       |                             |  | PC                         | 1.40           |                            |



A2A-ST 1g

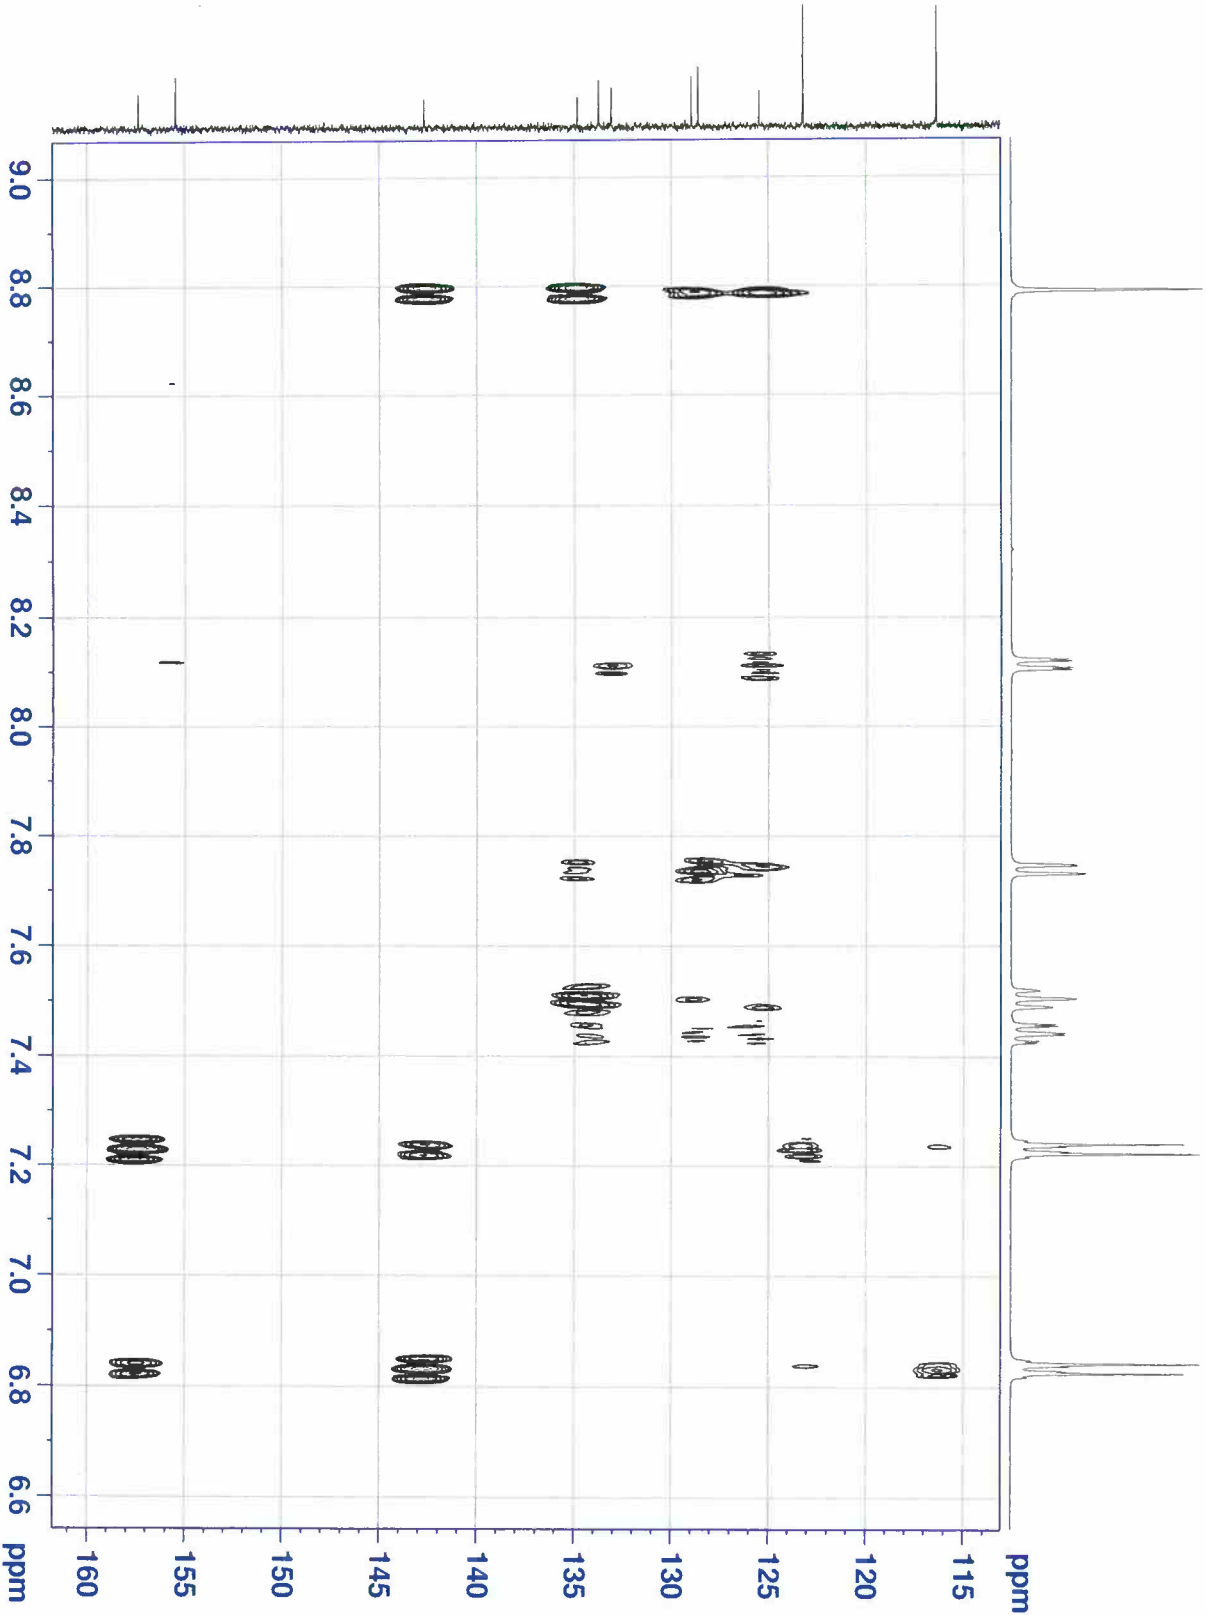

Current Data Parameters  
 NAME Z2ddu\_AZ47  
 EXPNO 7  
 PROCNO 1

F2 - Acquisition Parameters  
 Date\_ 20220601  
 Time 23.37 h  
 INSTRUM Avance NEO  
 PROBD 2167419.0024 (PULPROG hmcpg1pndqf  
 TD 4096  
 SOLVENT DMSO  
 NS 16  
 DS 16  
 SMH 4310.345 Hz  
 FIDRES 2.114561 Hz  
 AQ 0.115130 sec  
 RG 101  
 DW 116.000 usec  
 DE 6.50 usec  
 TE 297.9 K  
 CNST2 145.000000  
 CNST13 10.000000  
 DO 0.0000300 sec  
 D1 1.5000000 sec  
 D2 0.00344828 sec  
 D6 0.0500000 sec  
 TNO 0.0001801 sec  
 TDav 1  
 SFO1 499.8730295 MHz  
 NUC1 1H  
 P1 9.73 usec  
 P2 19.46 usec  
 PLM1 32.1800031 W  
 SFO2 125.7049807 MHz  
 NUC2 13C  
 P3 3.00 usec  
 P4 106.9300001 W  
 GPM1(1) SMSQ10.100  
 GP21 30.00 %  
 GPM1(2) SMSQ10.100  
 GP22 30.00 %  
 GPM1(3) SMSQ10.100  
 GP23 40.10 %  
 P16 1000.00 usec

F1 - Acquisition Parameters  
 CQ1 128  
 SW\_F1 220.000000

F2 - Processing Parameters  
 SI 1024  
 MC2 125.6924115 MHz  
 WDW Q5INE  
 SSB 0 Hz  
 GB 0 Hz  
 PC 1.40

F1 - Processing Parameters  
 SI 1024  
 MC2 125.6924115 MHz  
 WDW Q5INE  
 SSB 0 Hz  
 GB 0 Hz

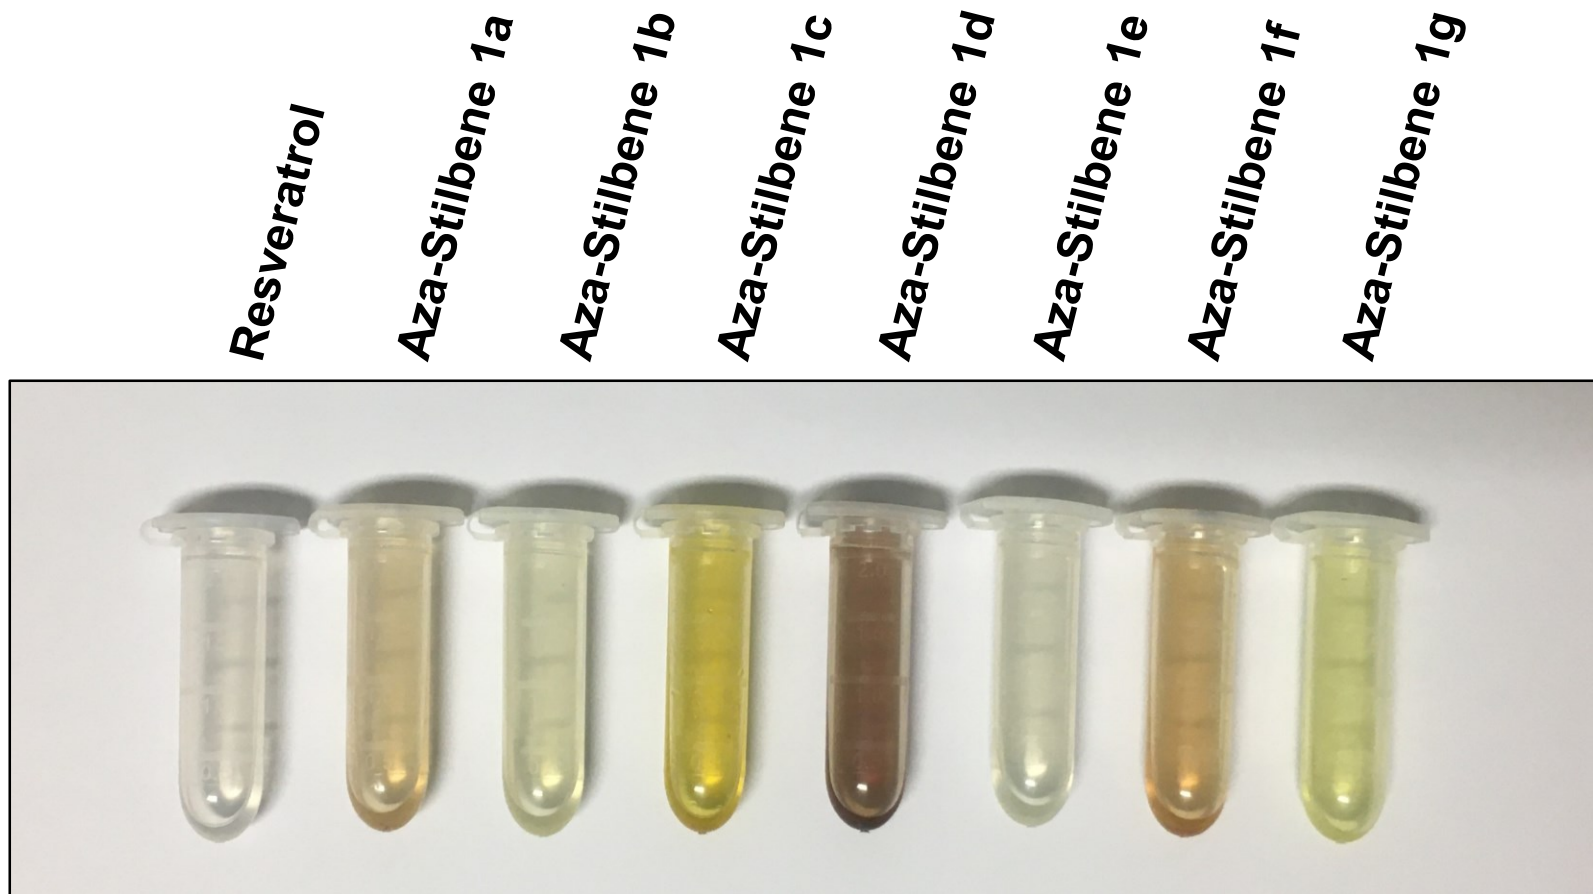

- Stock solutions were prepared at 50 mM
- Resveratrol (*trans*-resveratrol) was diluted in absolute ethanol (EtOH)
- Aza-Stilbenes 1a to 1g were diluted in dimethyl sulfoxide (DMSO)
